# Supplementary material for: Versatile synthesis of chiral 6-oxoverdazyl radical ligands – new building blocks for multifunctional molecule-based magnets
Source: Royal Society of Chemistry journal article supplement (doi:10.1039/c8dt00840j), 2018-01-01
Supplement: c8dt00840j1.pdf [file c8dt00840j1.pdf]

# Versatile synthesis of chiral 6-oxoverdazyl radical ligands – new building blocks for multifunctional molecule-based magnets

Atena B. Solea,<sup>a</sup> Tobie Wohlhauser,<sup>a</sup> Parisa Abbasi,<sup>b</sup> Yvan Mongbanziama,<sup>a</sup> Aurelien Crochet,<sup>c</sup> Katharina M. Fromm,<sup>c</sup> Ghenadie Novitchi,<sup>d</sup> Cyrille Train,<sup>d</sup> Melanie Pilkington\*<sup>b</sup> and Olimpia Mamula\*<sup>a</sup>

- <sup>a.</sup> Department of Chemistry, University of Applied Sciences Western Switzerland (HES-SO), HEIA-FR, Pérolles 80, CH-1700 Fribourg, Switzerland. Email: [olimpia.mamulasteiner@hefr.ch](mailto:olimpia.mamulasteiner@hefr.ch)
- <sup>b.</sup> Department of Chemistry, Brock University, 1812 Sir Isaac Brock Way, St Catharines, Ontario L2S3A1, Canada
- <sup>c.</sup> Department of Chemistry, University of Fribourg, Ch. du Musée 9, CH-1700 Fribourg, Switzerland
- <sup>d.</sup> Laboratoire National des Champs Magnétiques Intenses, UPR CNRS 3228, 25, rue des Martyrs, B.P. 166, 38042 Grenoble, France

## Electronic Supplementary Information

### S1. Experimental

- S1.1 Starting materials and general methodology
- S1.2 Preparation of precursor chiral aldehydes **P1** and **P2**.
- S1.3 Preparation of precursor hydrazides **Ha** - **Hc**
- S1.4 Preparation of tetrazinanones **T1a** – **c** and **T2a** – **c**
- S1.5 Preparation of verdazyl radicals **1a** – **c** and **2a** – **c**
- S1.6 Preparation of Cu(II) complex **3b**

### S2 Crystallographic Data

- S2.1 Summary of crystallographic data for **P1**, **P2**, **T2b** and **3b**.
- S2.2 Molecular structures of **P1** and **P2**

### S3 Selective Analytical Data

- S3.1 <sup>1</sup>H NMR spectroscopy data
- S3.2 IR spectroscopy data for **T1a**, **T2a**, **1a** and **2a**
- S3.3 UV-Vis spectroscopy data for **1a-c** and **2a-c**
- S3.4 Mass spectrometry data for **1a** and **2a**
- S3.5 EPR spectroscopy data for **2a-c**

### S4 Computational Studies

### S5 References

# S1. Experimental

## S1.1 Starting Materials and General Methodology

(-)-myrtenal 98% ee and (-)-alpha-pinene 97% ee, purchased from Sigma, were used without further purification. If dry solvents were used, they were stored at RT over molecular sieves 4 Å (8-12 mesh) overnight prior to use. Commercially available chemicals were reagent grade purchased from Sigma Aldrich and used without further purification unless indicated otherwise. Yields reported were for isolated, spectroscopically pure compounds. The Kröhnke salt was synthesized following the reported procedure.<sup>[1]</sup> (+)-pinocarvone was obtained following the method previously described in the literature,<sup>[2]</sup> using a glass 400ml photo-reactor and a gas-discharge sodium-vapor lamp. <sup>i</sup>PrNH-NHBoc,<sup>[3]</sup> Boc1,<sup>[4]</sup> 2,4 dimethyl-carbonylhydrazide (**Ha**),<sup>[5]</sup> 2,4 diisopropyl-carbonylhydrazide (**Hb**)<sup>[6]</sup> were obtained as described in the literature. When inert conditions were required, the reactions were performed under a N<sub>2</sub> or Ar atmosphere using dried glassware. TLC was carried out on GF254 plates (0.25 mm layer thickness). Flash chromatography was performed using silica gel 60.

**Optical rotations** were measured on a Anton Paar Modular Circular Polarimeter MCP 100. The measurements were carried out in a quartz vessel ( $\lambda = 100$  mm) with the sodium D line of a sodium lamp (589 nm).

**IR spectra** were recorded as solids or oils between 4000 – 400 cm<sup>-1</sup> on a Bruker ALPHA FTIR. **UV-Vis** spectra were recorded at room temperature on a Perkin Elmer spectrometer Lambda 18 or a Beckman Coulter DU 720 General-Purpose UV-Vis spectrophotometer.

**MS** spectra were measured with a Bruker FT-MS 4.7T Bio Apex II instrument, while Electrospray Ionization (ESI) measurements were recorded on a Carlo Erba/Kratos EC/ms acquisition system and processed on a SPARC workstation. Samples were introduced through a direct inlet system, with *tris*(perfluoroheptyl-S-triazine) as the internal standard. Time-of-Flight mass spectrometry (TOF-MS) measurements were carried out on a micromass LCT – Electrospray Ionization Time-of-Flight mass spectrometer.

**NMR** <sup>1</sup>H NMR spectra were recorded on a Bruker Advance DPX 300 or Bruker Advance AV 400 Digital NMR spectrometer using deuterated solvents with TMS or the residual solvent proton as internal standard (CDCl<sub>3</sub> = 7.26 ppm, D<sub>2</sub>O=4.79 ppm). Coupling constants are reported in Hz.

**Electrochemical studies** were performed under nitrogen using a BASi EC-epsilon Autoanalyzer and a standard three-electrode assembly (glassy carbon working, Pt wire auxiliary, and Ag/AgNO<sub>3</sub> reference) with 0.1 M NBu<sub>4</sub>PF<sub>6</sub> as the supporting electrolyte. Quoted potentials are versus the ferrocene/ferrocenium couple that was used as the internal standard. The scan rates for the cyclic voltammetry were 100 mV/s.

**EPR** spectra were recorded in solution in quartz tubes on a Bruker Elexsys E580 pulsed spectrometer with a microwave frequency of 9.8705 GHz and 2 Gauss modulation running in continuous wave (*cw*) mode. The EPR data were modelled using the WINSIM simulation software.<sup>[7]</sup>

**DFT** calculations: DFT calculations were undertaken on verdazyl radicals **1a** and **2a** based on a geometry-optimized structure using the UB3LYP basis set and 6-311G\*\* functional in Jaguar 9.0.<sup>[8]</sup>

### S1.2 Preparation of Precursor Chiral Aldehydes P1 and P2

The chiral aldehydes precursors **P1** and **P2** were synthesized in three steps (Scheme S1.1) according to the procedure described by Bernhard *et al.*<sup>[1]</sup> Either (-)-1R-myrtanal or (+)-pinocarvone, drawn from the chiral pool, was reacted with Kröhnke's salt to produce the corresponding 5,6- or 4,5-pinenepyrindine furan which was transformed to a methoxycarbonyl group via successive oxidation and esterification reactions. Subsequent reduction with LiAlH<sub>4</sub> led to the enantiopure aldehydes **P1** and **P2**.

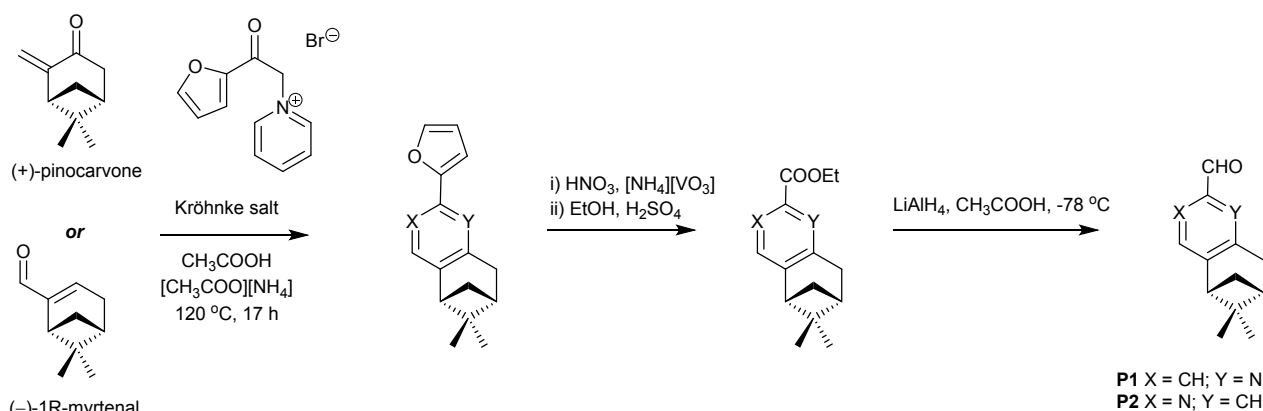

Scheme S1.1 Synthesis of chiral aldehydes **P1** and **P2**.

### S1.3 Preparation of Precursor Hydrazides

The 2,4-disubstituted carbohydrazides (**Ha**, **Hb** and **Hc**) were synthesized from the corresponding alkyl hydrazines (Scheme S1.2). The dimethyl derivative (**Ha**) was synthesized in one step according to the literature method.<sup>[9]</sup> As demonstrated earlier,<sup>[6]</sup> this straightforward method cannot be applied to hydrazides containing bulkier derivatives (such as **Hb** and **Hc**) due to the smaller difference in nucleophilicity between their primary and secondary amino groups which leads to low regioselectivity and poor yields. Thus, the primary amino group was protected by a Boc group before reaction with phosgene. **Hb** was prepared from coupling *tert*-butyl carbazate together with acetone and subsequent reduction with NaBH<sub>3</sub>CN.<sup>[6]</sup> Two different approaches to the diphenyl derivative (**Hc**) have previously been reported. Masuda *et al.*<sup>[10]</sup> following the previously described *bis*-arylation of carbohydrazide in the presence of CuI in 21% yield. Minor modifications by Matuschek *et al.*<sup>[5]</sup> led to an improved yield of 37%. Another approach uses 2,4,6-triphenyltetrazinone which undergoes acid hydrolysis to give the phenyl carbohydrazide.<sup>[11]</sup> Instead we utilized the route applied to **Hb** to prepare **Hc**. The phenylhydrazine was initially protected with a Boc group,<sup>[4]</sup> followed by reaction with phosgene, to give the intermediate **Boc2** (Scheme S1.2). The diphenyl derivative **Hc** was readily obtained from deprotection of **Boc2** in a total yield of 41 % for the two-step reaction and required no further purification, simplifying the scale-up.

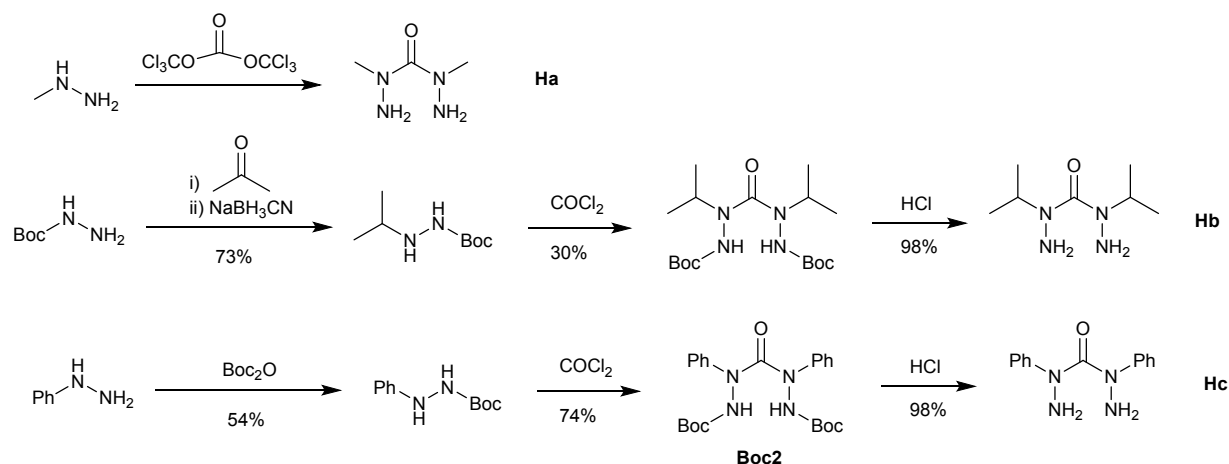

Scheme S1.2 Synthesis of hydrazides **Ha** - **Hc**

### Boc protected 2,4-diphenyl-carbonylhydrazide (Boc2)

Boc-phenylhydrazine (19.83g, 95.23mmol, 1eq) was dissolved in dry toluene (100 mL) and dry triethylamine (13.23 mL, 95.23 mmol, 1eq) was added. To this a solution of 20% phosgene in toluene (24.6 mL, 47.61 mmol, 0.5eq) was added dropwise at a rate of less than one drop per second. During the addition, a precipitate of triethylamine hydrochloride was formed. When the addition was complete, the solution was stirred at RT overnight and then filtered. The solvent was evaporated from the filtrate and the resulting solid was dried to give the crude product. This was purified by recrystallization from heptane to give the pure Boc protected 2,4-diphenyl-carbonylhydrazide (**Boc2**) (9.92g,  $\eta$  = 47%) as a light orange solid.  $^1\text{H NMR}$  (300 MHz,  $\text{CDCl}_3$ )  $\delta$  7.19 (m, 4H,  $\text{H}_{\text{meta}}$ ), 6.85 (m, 2H,  $\text{H}_{\text{para}}$ ), 6.77 (m, 4H,  $\text{H}_{\text{ortho}}$ ) 6.57 (s, 1H), 5.86 (s, 1H), 1.45 (s, 18H).  $^{13}\text{C NMR}$  (75 MHz,  $\text{CDCl}_3$ )  $\delta$  156.39, 148.44, 129.13, 120.69, 112.99, 81.17, 28.29. **HRMS (ESI)**  $m/z$ :  $[\text{M}+\text{Na}]^+$  calcd for  $\text{C}_{23}\text{H}_{30}\text{N}_5\text{O}$  465.21084, found 465.21082. **IR**:  $\tilde{\nu}$  = 3350, 3275 (m, NH stretch), 3055, 3000, 2980, 2930 (m, CH stretch), 1700 (s, C=O stretch), 1539, 1495, 1450 (s,  $\text{CH}_3$  bending)  $\text{cm}^{-1}$ .

### 2,4-diphenyl-carbonylhydrazide-2HCl

**Boc2** (443 mg, 1mmol, 1eq) was dissolved in EtOH (8 mL). To this solution, 32% HCl (3 mL) was added dropwise under continuous stirring, during which a mild effervescence was observed. The reaction mixture was stirred at 40°C for 2h. During the course of the reaction a pearly precipitate was formed. After cooling to RT, the solvent was removed under reduced pressure and the solid was further dried under high vacuum affording 0.263 g (83%) of **Hc** as a pearly white solid.  $^1\text{H NMR}$  (300 MHz,  $\text{D}_2\text{O}$ )  $\delta$  7.41 (dd,  $^3J_{\text{meta,ortho}}$  = 7.8 Hz,  $^3J_{\text{meta,para}}$  = 7.6 Hz, 4H,  $\text{H}_{\text{meta}}$ ), 7.15 (t,  $^3J_{\text{para,meta}}$  = 7.6 Hz, 2H,  $\text{H}_{\text{para}}$ ), 7.03 (d,  $^3J_{\text{ortho,meta}}$  = 7.8 Hz, 4H,  $\text{H}_{\text{ortho}}$ ).

### S1.4 Synthesis of the tetrazinanones (T1a-c, T2a-c)

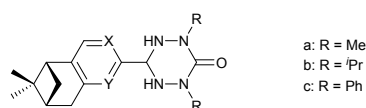

T1: X = CH, Y = N; T2 X = N, Y = CH

Under an inert atmosphere, the corresponding aldehyde (**P1** or **P2**) (1.0 g, 4.96 mmol, 1 eq) was dissolved in MeOH (70 mL). Afterwards, the corresponding carbonylhydrazide (4.96 mmol, 1 eq) was added to the solution. The reaction mixture was refluxed for 24h. After cooling to room temperature, the solvent was removed under reduced pressure to give the corresponding crude products as brown oils. These were purified by flash chromatography on silica gel; For **T1a** and **T2a** the eluent was hexane: EtOAc = 1:1 followed by EtOAc: MeOH = 1:1, for **T1b** the eluent was EtOAc, for **T2b** the preferred eluent was  $\text{CHCl}_3$ : MeOH = 10:1, whereas for **T1c** and **T2c** a mixture 4:1 hexane: EtOAc proved to be the most effective.

#### (-)-1,5-dimethyl-3-(5,6-pinene-2-ylidene)-tetrazinanone (T1a)

$\eta$  = 85%.  $^1\text{H NMR}$  (300 MHz,  $\text{CDCl}_3$ )  $\delta$  7.23 (d,  $^3J_{3,4}$  = 7.5 Hz, 1H, H3), 7.10 (d,  $^3J_{4,3}$  = 7.5 Hz, 1H, H4), 5.00 (d,  $^3J_{\text{NH},1}$  = 10.8 Hz, 2H, NH), 4.80 (dd,  $^3J_{1,\text{NH}}$  = 10.8 Hz,  $^3J_{1,\text{NH}_a}$  = 10.8 Hz, 1H, H1), 3.18 (s, 3H, H15), 3.17 (s, 3H, H15a), 3.04 (d,  $^3J_{10,9}$  = 2.8 Hz, 2H, H10), 2.76 (dd,  $^3J_{7,11a}$  = 5.7 Hz,  $^3J_{7,11b}$  = 5.7 Hz, 1H, H7), 2.67 (ddd,  $^2J_{11b,11a}$  = 9.7 Hz,  $^3J_{11b,7}$  = 5.8 Hz,  $^3J_{11b,9}$  = 5.8 Hz, 1H, H11b), 2.36 (m, 1H, H9), 1.40 (s, 3H, H13), 1.20 (d,  $J$  = 9.7 Hz, 1H, H11a), 0.60 (s, 3H, H12).  $^{13}\text{C NMR}$  (75 MHz,  $\text{CDCl}_3$ )  $\delta$  157.30, 154.46, 150.23, 142.77, 133.82, 120.12, 69.35, 46.33, 39.99, 39.37, 38.06, 38.04, 36.28, 31.75, 25.93, 21.25. **HRMS (ESI)**  $m/z$ :  $[\text{M}+\text{H}]^+$  calcd for  $\text{C}_{16}\text{H}_{24}\text{N}_5\text{O}$  302.19808, found 302.19699. **IR**:  $\tilde{\nu}$  = 3200 (br s, NH), 2900, 2875, 2850 (br m, CH), 1625 (br m, C=O), 1375 (m,  $\text{CH}_3$  bending)  $\text{cm}^{-1}$ . Anal. Calcd for  $\text{C}_{16}\text{H}_{23}\text{N}_5\text{O}$ : C, 63.76; H, 7.69; N, 23.24; Found C, 63.82; H, 7.57; N 23.15.  $[\alpha]_{\text{D}}^{20}$  = -73.6  $\text{deg}\cdot\text{mL}\cdot\text{g}^{-1}\cdot\text{dm}^{-1}$  (0.5M in  $\text{CH}_2\text{Cl}_2$ ).

#### (-)-1,5-dimethyl-3-(4,5-pinene-2-ylidene)-tetrazinanone (T2a)

$\eta$  = 65%.  $^1\text{H NMR}$  (300 MHz,  $\text{CDCl}_3$ )  $\delta$  8.05 (s, 1H, H6), 7.21 (s, 1H, H3), 4.92 (m, 3H, H1, N2H, N5H), 3.18 (s, 3H, H15), 3.16 (s, 3H, H15a), 2.97 (d,  $^3J_{10,9}$  = 2.7 Hz, 2H, H10), 2.82 (dd,  $^3J_{7,11a}$  = 5.8 Hz,  $^3J_{7,11b}$  = 5.8 Hz, 1H, H7), 2.68 (ddd,  $^2J_{11b,11a}$  = 9.7 Hz,  $^3J_{11b,7}$  = 5.8 Hz,  $^3J_{11b,9}$  = 5.8 Hz, 1H, H11b), 2.29 (m, 1H, H9), 1.39 (s, 3H, H13), 1.14 (d,  $^2J_{11a,11b}$  = 9.7 Hz, 1H, H11a), 0.60 (s, 3H, H12).  $^{13}\text{C NMR}$  (75 MHz,  $\text{CDCl}_3$ )  $\delta$  154.57, 151.49, 146.25, 145.91, 143.61, 123.01, 69.51, 44.52, 40.00, 39.18, 38.20, 38.18, 32.91, 31.76, 26.04, 21.47. **HRMS (ESI)**  $m/z$ :  $[\text{M}+\text{H}]^+$  calcd for  $\text{C}_{16}\text{H}_{24}\text{N}_5\text{O}$  302.19808, found 302.19707. **IR**:  $\tilde{\nu}$  = 3150 (m, NH), 2900, 2875, 2850 (m, CH), 1625 (m, C=O), 1375 (m,  $\text{CH}_3$  bending)  $\text{cm}^{-1}$ . Anal. Calcd for  $\text{C}_{16}\text{H}_{23}\text{N}_5\text{O}$ : C, 63.76; H, 7.69; N, 23.24; Found C, 63.75; H, 7.43; N 23.54.  $[\alpha]_{\text{D}}^{20}$  = -62.9  $\text{deg}\cdot\text{mL}\cdot\text{g}^{-1}\cdot\text{dm}^{-1}$  (0.5M in  $\text{CH}_2\text{Cl}_2$ ).

#### (-)-1,5-diisopropyl-3-(5,6-pinene-2-ylidene)-tetrazinanone (T1b)

$\eta$  = 73%.  $^1\text{H NMR}$  (300 MHz,  $\text{CDCl}_3$ )  $\delta$  7.20 (d,  $^3J_{3,4}$  = 7.5 Hz, 1H, H3), 7.03 (d,  $^3J_{4,3}$  = 7.5 Hz, 1H, H4), 4.68 (hept,  $J$  = 6.6 Hz, 2H, H15, H15a), 4.34 (m, 3H, H1, NH), 3.03 (d,  $^3J_{10,9}$  = 2.6 Hz, 2H, H10), 2.74 (dd,  $^3J_{7,11a}$  = 5.7 Hz,  $^3J_{7,11b}$  = 5.7 Hz, 1H, H7), 2.64 (ddd,  $^2J_{11b,11a}$  = 9.7 Hz,  $^3J_{11b,7}$  = 5.7 Hz,  $^3J_{11b,9}$  = 5.7 Hz, 1H, H11b), 2.35 (m, 1H, H9), 1.38 (s, 3H, H13), 1.22 (d,  $^2J_{11a,11b}$  = 9.7 Hz, 1H, H11a), 1.07 (m, 12H, H16, H17, H16a, H17a), 0.62 (s, 3H, H12).  $^{13}\text{C NMR}$  (75 MHz,  $\text{CDCl}_3$ )  $\delta$  157.19, 153.60, 151.21, 142.54, 133.84, 120.15, 71.23,

47.66, 47.58, 46.38, 40.08, 39.46, 36.31, 31.77, 26.01, 21.45, 19.50, 19.48, 18.46. **HRMS (ESI)  $m/z$ :**  $[M+H]^+$  calcd for  $C_{20}H_{32}N_5O$  358.26014, found 358.26006. **IR:**  $\tilde{\nu}$  = 3220 (m, NH), 2960, 2920, 2870 (m, CH), 1670 (s, C=O), 1425, 1385 (s, CH<sub>3</sub> bending)  $cm^{-1}$ . Anal. Calcd for  $C_{20}H_{31}N_5O$ : C, 67.19; H, 8.74; N, 19.59; Found C, 67.22; H, 8.52; N 19.63.  $[\alpha]_D^{20}$  = -69.1  $deg \cdot mL \cdot g^{-1} \cdot dm^{-1}$  (0.5M in  $CH_2Cl_2$ ).

**(-)-1,5-diisopropyl-3-(4,5-pinenepyridine)-tetrazinanone (T2b)**

$\eta$  = 59%. **<sup>1</sup>H NMR** (300 MHz,  $CDCl_3$ )  $\delta$  8.01 (s, 1H, H6), 7.12 (s, 1H, H3), 4.65 (m, 2H, H15, H15a), 4.30 (m, 3H, H1, NH), 2.94 (d,  $^3J_{10,9}$  = 2.5 Hz, 2H, H10), 2.77 (dd,  $^3J_{7,11a}$  = 5.5 Hz,  $^3J_{7,11b}$  = 5.5 Hz, 1H, H7), 2.63 (ddd,  $^2J_{11b,11a}$  = 9.8 Hz,  $^3J_{11b,7}$  = 5.8 Hz,  $^3J_{11b,9}$  = 5.8 Hz, 1H, H11b), 2.23 (m, 1H, H9), 1.35 (s, 3H, H13), 1.13 (d,  $^2J_{11a,11b}$  = 9.8 Hz, 1H, H11a), 1.05 (m, 12H, H16, H17, H16a, H17a), 0.59 (s, 3H, H12). **<sup>13</sup>C NMR** (75 MHz,  $CDCl_3$ )  $\delta$  152.34, 151.09, 144.96, 144.61, 142.21, 121.94, 70.00, 46.51, 46.43, 43.24, 38.74, 38.07, 31.70, 30.55, 28.68, 24.88, 20.49, 18.39, 17.38. **HRMS (ESI)  $m/z$ :**  $[M+H]^+$  calcd for  $C_{20}H_{32}N_5O$  358.26014, found 358.26034. **IR:**  $\tilde{\nu}$  = 3220 (m, NH), 2970, 2920, 2870 (m, CH), 1620 (s, C=O), 1425, 1385 (s, CH<sub>3</sub> bending)  $cm^{-1}$ . Anal. Calcd for  $C_{20}H_{31}N_5O$ : C, 67.19; H, 8.74; N, 19.59; Found C, 67.54; H, 8.63; N 19.15.  $[\alpha]_D^{20}$  = -54.7  $deg \cdot mL \cdot g^{-1} \cdot dm^{-1}$  (0.5M in  $CH_2Cl_2$ ).

**(-)-1,5-diphenyl-3-(5,6-pinenepyridine)- tetrazinanone (T1c)**

$\eta$  = 45%. **<sup>1</sup>H NMR** (300 MHz,  $CDCl_3$ )  $\delta$  7.55 (m, 4H), 7.14 (m, 8H), 5.42 (d,  $^3J_{N2H,1}$  = 11.2 Hz, 1H, N2H), 5.42 (d,  $^3J_{N5H,1}$  = 11.2 Hz, 1H, N5H), 5.12 (dd,  $^3J_{1,N2H}$  = 11.2 Hz,  $^3J_{1,N5H}$  = 11.2, 1H, H1), 2.93 (d,  $^3J_{10,9}$  = 2.4 Hz, 2H, H10), 2.70 (dd,  $^3J_{7,11a}$  = 5.5 Hz,  $^3J_{7,11b}$  = 5.5 Hz, 1H, H7), 2.55 (m, 1H, H11b), 2.59 (m, 1H, H9), 1.31 (s, 3H, H13), 1.12 (d,  $^2J_{11a,11b}$  = 9.7 Hz, 1H, H11a), 0.51 (s, 3H, H12). **<sup>13</sup>C NMR** (75 MHz,  $CDCl_3$ )  $\delta$ : 157.18, 152.21, 150.20, 142.98, 142.49, 142.45, 134.02, 128.38, 128.34, 124.95, 124.81, 123.39, 123.15, 120.33, 71.20, 46.23, 39.89, 39.41, 36.27, 31.78, 25.98, 21.34. **HRMS (ESI)  $m/z$ :**  $[M+H]^+$ : calcd. for  $C_{26}H_{28}N_5O$  426.22939, found 426.22901. **IR:**  $\tilde{\nu}$  = 3241 (b, NH), 3060 (w), 2923(m), 2867 (m, CH), 1653(s, C=O), 1596(s, NH bending), 1491, 1453, 1392, 1353, (s, CH bending, C=C stretch). Anal. Calcd for  $C_{26}H_{27}N_5O$ : C, 73.39; H, 6.40; N, 16.46; Found C, 73.22; H, 6.63; N 16.67.  $[\alpha]_D^{20}$  = -34.7  $deg \cdot mL \cdot g^{-1} \cdot dm^{-1}$  (7.06 mM in  $CH_2Cl_2$ ).

**(-)-1,5-diphenyl-3-(4,5-pinenepyridine)- tetrazinanone (T2c)**

$\eta$  = 50%. **<sup>1</sup>H NMR** (300 MHz,  $CDCl_3$ )  $\delta$  8.06 (s, 1H), 7.65 (m, 4H), 7.31 (m, 5H), 7.12(m, 2H), 5.51(d,  $^3J_{N2H,1}$  = 11.3 Hz, 1H, N2H) 5.43 (d,  $^3J_{N5H,1}$  = 11.3 Hz, 1H, N5H), 5.23 (dd,  $^3J_{1,N2H}$  = 11.3 Hz,  $^3J_{1,N5H}$  = 11.3 Hz, 1H, H1), 3.00 (d,  $^3J_{10,9}$  = 2.6 Hz, 2H, H10), 2.83 (dd,  $^3J_{7,11a}$  = 5.6 Hz,  $^3J_{7,11b}$  = 5.6 Hz, 1H, H7), 2.70 (ddd,  $^2J_{11b,11a}$  = 9.7 Hz,  $^3J_{11b,7}$  = 5.8 Hz,  $^3J_{11b,9}$  = 5.8 Hz, 1H, H11b), 2.32 (m, 1H, H9), 1.41 (s, 3H, H13), 1.09 (d,  $^2J_{11a,11b}$  = 9.7 Hz, 1H, H11a), 0.62 (s, 3H, H12). **<sup>13</sup>C NMR** (75 MHz,  $CDCl_3$ )  $\delta$  152.56, 151.60, 146.30, 146.29, 145.69, 143.74, 142.62, 128.46, 128.42, 125.01, 124.88, 123.34, 123.16, 123.13, 71.48, 44.53, 40.01, 39.22, 32.95, 31.76, 26.05, 21.52. **HRMS (ESI)  $m/z$ :**  $[M+H]^+$ : calcd. for  $C_{26}H_{28}N_5O$  426.22939, found 426.22828. **IR:**  $\tilde{\nu}$  = 3232 (w, NH), 3065, 2922, 2867 (m, CH stretch), 1652(s, C=O), 1596(s, NH bending), 1487, 1454, 1358(s, CH bending, C=C stretch). Anal. Calcd for  $C_{26}H_{27}N_5O$ : C, 73.39; H, 6.40; N, 16.40; Found C, 73.13; H, 6.34; N 16.17.  $[\alpha]_D^{20}$  = -32.7  $deg \cdot mL \cdot g^{-1} \cdot dm^{-1}$  (7.06 mM in  $CH_2Cl_2$ ).

**S1.5 Synthesis of the 6-oxoverdazyl radicals (1a-c and 2a-c)**

In a general procedure, the corresponding tetrazinanone (0.235 mmol, 1 eq) was reacted with benzoquinone (38 mg, 0.352 mmol, 1.5 eq), in anhydrous toluene (5 mL) under argon, at reflux, for 1.5h. The solvent was then evaporated under reduced pressure and the residue obtained was purified by column chromatography on silica gel, using a mixture of hexane:EtOAc (4:0.5) as the eluent.

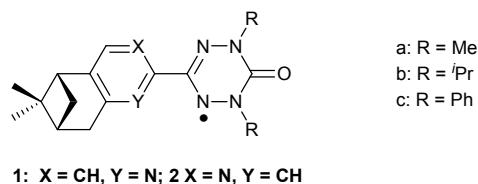

**(-)-1,5-dimethyl-3-(5,6-pinenepyridine)-oxoverdazyl (1a)**

$\eta$  = 42% (29 mg). **HRMS (ESI)  $m/z$ :**  $[M]^+$ : calcd. for  $C_{16}H_{20}N_5O$  298.1668, found 298.1663. Anal. Calcd for  $C_{16}H_{20}N_5O$ : C, 64.41; H, 6.76; N, 23.47; Found C, 64.63; H, 6.55; N 23.78.  $[\alpha]_D^{20}$  = -26.8  $deg \cdot mL \cdot g^{-1} \cdot dm^{-1}$  (1mM in  $CH_2Cl_2$ )

**(-)-1,5-diisopropyl-3-(5,6-pinenepyridine)-oxoverdazyl (1b)**

$\eta$  = 39% (33 mg). **HRMS (ESI)  $m/z$ :**  $[M+H]^+$ : calcd. for  $C_{20}H_{29}N_5O$  355.23721, found 355.23608. Anal. Calcd for  $C_{20}H_{28}N_5O$ : C, 67.77; H, 7.96; N, 19.76; Found C, 67.39; H, 7.66; N 19.68.  $[\alpha]_D^{20}$  = -31.1  $deg \cdot mL \cdot g^{-1} \cdot dm^{-1}$  (1mM in  $CH_2Cl_2$ )

**(-)-1,5-diphenyl-3-(5,6-pinenepyridine)- oxoverdazyl (1c)**

$\eta$  = 10% (10 mg). **HRMS (ESI)  $m/z$ :**  $[M + C_6H_4O_2]^+$ : calcd. for  $C_{32}H_{28}N_5O_3$  530.21921, found 530.21881. Anal. Calcd for  $C_{32}H_{28}N_5O_3$ : C, 72.44; H, 5.32; N, 13.20; Found C, 72.21; H, 5.65; N 13.38.  $[\alpha]_D^{20}$  = -13.3  $deg \cdot mL \cdot g^{-1} \cdot dm^{-1}$  (1mM in  $CH_2Cl_2$ )

**(-)-1,5-dimethyl-3-(4,5-pinenepyridine)- oxoverdazyl (2a)**

$\eta$ =20% (14 mg). **HRMS (ESI)  $m/z$ :**  $[M]^+$ : calcd. for  $C_{16}H_{20}N_5O$  298.1668, found 298.1660. Anal. Calcd for  $C_{16}H_{20}N_5O$ : C, 64.41; H, 6.76; N, 23.47; Found C, 64.21; H, 6.25; N 23.34.  $[\alpha]_D^{20} = -20.1 \text{ deg}\cdot\text{mL}\cdot\text{g}^{-1}\cdot\text{dm}^{-1}$  (c 0.1, DCM).

**(-)-1,5-diisopropyl-3-(4,5-pinenepyridine)- oxoverdazyl (2b)**

$\eta$ =14% (12 mg). **HRMS (ESI)  $m/z$ :**  $[M+H]^+$ : calcd. for  $C_{20}H_{29}N_5O$  355.23721, found 355.23687. Anal. Calcd for  $C_{20}H_{28}N_5O$ : C, 67.77; H, 7.96; N, 19.76; Found C, 67.71; H, 7.66; N 19.75.  $[\alpha]_D^{20} = -93.2 \text{ deg}\cdot\text{mL}\cdot\text{g}^{-1}\cdot\text{dm}^{-1}$  (1mM in  $CH_2Cl_2$ )

**(-)-1,5-diphenyl-3-(4,5-pinenepyridine)- oxoverdazyl (2c)**

$\eta$ =40% (40 mg). **HRMS (ESI)  $m/z$ :**  $[M+H]^+$ : calcd. for  $C_{26}H_{25}N_5O$  423.20591, found 423.20488. Anal. Calcd for  $C_{26}H_{24}N_5O$ : C, 73.91; H, 5.73; N, 16.58; Found C, 73.87; H, 5.75; N 16.48.  $[\alpha]_D^{20} = -16.6 \text{ deg}\cdot\text{mL}\cdot\text{g}^{-1}\cdot\text{dm}^{-1}$  (1mM in  $CH_2Cl_2$ )

**S1.6 Preparation of the Cu(II) complex (3b)**

Under inert atmosphere,  $CuCl_2\cdot 2H_2O$  (0.168 mmol, 29 mg) in EtOH (1.5 mL) was added over a solution of **2b** (0.168 mmol, 60 mg) in EtOH (1.5 mL). Immediately, the mixture turned purple. The reaction mixture was stirred at room temperature for 30 minutes. Crystallization from the mother mixture at  $-20^\circ\text{C}$  afforded **3b** as single crystals. Yield: 55 mg, 62%. Anal. Calcd for  $C_{20}H_{28}Cl_2CuN_5O$ : C, 49.13; H, 5.77; N, 14.32; Found C, 49.45; H, 5.63; N 14.63. **IR:**  $\tilde{\nu} = 2922$  (s, CH), 1699(s, C=O), 1650 (m, C=N stretch), 1458, 1368, 1287, 1261, 1234, (m, CH bending, C=C stretch, N-N stretch), 433 (w, Cu-N stretch).

## S2. Crystallographic Data

**Single crystal X-ray structure determination:** single crystals of all four compounds were mounted on a cryoloop and data were measured on a STOE IPDS-II diffractometer equipped with an Oxford Cryosystem open flow cryostat<sup>[12]</sup> using Mo-K $\alpha$  radiation ( $\lambda = 0.71073 \text{ \AA}$ ) at 200 K. Absorption corrections were integrated within the data reduction procedure.<sup>[13]</sup> The structures were solved and refined using full-matrix least-squares on  $F^2$  with the SHELXL-2014 package.<sup>[14]</sup> All heavy atoms were refined anisotropically and hydrogen atoms were introduced as fixed contributors when a residual electronic density was observed near their expected positions. All crystal data are presented in Table S1. In the absence of significant anomalous scattering, the absolute structure could not be determined reliably and Friedel pairs were merged and the absolute structure assigned based on the experimentally determined chirality. The final Flack parameters were meaningless because of the high standard deviation from the real value: for **P1** (-0.7(10)), for **P2** (-3(5)) and for **T2b** (1.1(10)). Copies of the data can be obtained on quoting the depository numbers CCDC-1532176 (**P1**), CCDC-1532177 (**P2**), CCDC-1532178 (**T2b**) and CCDC-1811236 (**3b**), (Fax: +44-1223-336-033; E-Mail: deposit@ccdc.cam.ac.uk).

### S2.1 Summary of crystallographic data.

Table S2.1 Summary of Crystallographic details for **P1**, **P2**, **T2b** and complex (**3b**)

| Compound                                                                          | <b>P1</b>                                                     | <b>P2</b>                                                     | <b>T2b</b>                                                         | <b>3b</b>                                                          |
|-----------------------------------------------------------------------------------|---------------------------------------------------------------|---------------------------------------------------------------|--------------------------------------------------------------------|--------------------------------------------------------------------|
| <b>Formula</b>                                                                    | C <sub>13</sub> H <sub>15</sub> N O                           | C <sub>13</sub> H <sub>15</sub> NO                            | C <sub>20</sub> H <sub>31</sub> N <sub>5</sub> O                   | C <sub>20</sub> H <sub>28</sub> Cl <sub>2</sub> CuN <sub>5</sub> O |
| <b>FW (g mol<sup>-1</sup>)</b>                                                    | 201.26                                                        | 201.26                                                        | 357.50                                                             | 488.91                                                             |
| <b>Temperature (K)</b>                                                            | 200(2)                                                        | 200(2)                                                        | 200(2)                                                             | 200(2)                                                             |
| <b>Crystal System</b>                                                             | Monoclinic                                                    | Tetragonal                                                    | Orthorhombic                                                       | Monoclinic                                                         |
| <b>Space Group</b>                                                                | <i>P2</i> <sub>1</sub>                                        | <i>P4</i> <sub>3</sub> <i>2</i> <sub>1</sub> <i>2</i>         | <i>P2</i> <sub>1</sub> <i>2</i> <sub>1</sub> <i>2</i> <sub>1</sub> | <i>P2</i> <sub>1</sub>                                             |
| <b><i>a</i> (Å)</b>                                                               | 6.5369(4)                                                     | 7.5168(4)                                                     | 10.2955(5)                                                         | 13.0978(9)                                                         |
| <b><i>b</i> (Å)</b>                                                               | 7.0071(3)                                                     | 7.5168(4)                                                     | 12.3540(10)                                                        | 11.0063(7)                                                         |
| <b><i>c</i> (Å)</b>                                                               | 12.2187(7)                                                    | 39.316(2)                                                     | 16.2973(9)                                                         | 16.8554(14)                                                        |
| <b><math>\alpha</math> (°)</b>                                                    | 90                                                            | 90                                                            | 90                                                                 | 90                                                                 |
| <b><math>\beta</math> (°)</b>                                                     | 100.720(5)                                                    | 90                                                            | 90                                                                 | 105.955(6)                                                         |
| <b><math>\gamma</math> (°)</b>                                                    | 90                                                            | 90                                                            | 90                                                                 | 90                                                                 |
| <b><i>V</i> (Å<sup>3</sup>)</b>                                                   | 549.91(5)                                                     | 2221.4(3)                                                     | 2072.9(2)                                                          | 2336.2(3)                                                          |
| <b><i>Z</i></b>                                                                   | 2                                                             | 8                                                             | 4                                                                  | 4                                                                  |
| <b><i>D</i><sub>c</sub> (g. cm<sup>-3</sup>)</b>                                  | 1.215                                                         | 1.204                                                         | 1.146                                                              | 1.390                                                              |
| <b>Absorption coefficient (mm<sup>-1</sup>)</b>                                   | 0.077                                                         | 0.076                                                         | 0.073                                                              | 1.184                                                              |
| <b><i>F</i>(000)</b>                                                              | 216                                                           | 864                                                           | 776                                                                | 1016                                                               |
| <b>Theta range (°)</b>                                                            | 1.696 to 25.050°                                              | 2.072 to 25.156°                                              | 2.07 to 24.49                                                      | 1.256 to 25.196                                                    |
| <b>Index range</b>                                                                | -7<= <i>h</i> <=7<br>-8<= <i>k</i> <=8<br>-14<= <i>l</i> <=14 | -8<= <i>h</i> <=8<br>-8<= <i>k</i> <=8<br>-46<= <i>l</i> <=46 | -12 ≤ <i>h</i> ≤ 11<br>-14 ≤ <i>k</i> ≤ 14<br>-19 ≤ <i>l</i> ≤ 19  | -15 ≤ <i>h</i> ≤ 15<br>-13 ≤ <i>k</i> ≤ 15<br>-20 ≤ <i>l</i> ≤ 20  |
| <b>Reflections collected</b>                                                      | 7168                                                          | 28194                                                         | 19064                                                              | 30974                                                              |
| <b>Independent reflections</b>                                                    | 1944                                                          | 1977                                                          | 3694                                                               | 8315                                                               |
| <b>Data/restraints/parameter</b>                                                  | 1944 / 1 / 138                                                | 1977 / 0 / 140                                                | 3694/33/236                                                        | 8315/97/481                                                        |
| <b>Goodness of fit on <i>F</i><sup>2</sup> (<i>S</i>)</b>                         | 1.062                                                         | 1.384                                                         | 1.013                                                              | 0.913                                                              |
| <b>Final <i>R</i><sub>1</sub> (<i>I</i> &gt; 2 <math>\sigma</math>(<i>I</i>))</b> | 0.0317                                                        | 0.0507                                                        | 0.0673                                                             | 0.0759                                                             |
| <b>Final <i>wR</i><sub>2</sub> (all data)</b>                                     | 0.0891                                                        | 0.1564                                                        | 0.1939                                                             | 0.2174                                                             |
| <b>Largest peak/hole (e<sup>-</sup> Å<sup>-3</sup>)</b>                           | +0.112/-0.130                                                 | +0.205/-0.183                                                 | +0.189/-0.188                                                      | +0.556/-0.459                                                      |

## S.2.2 Molecular structures of P1 and P2

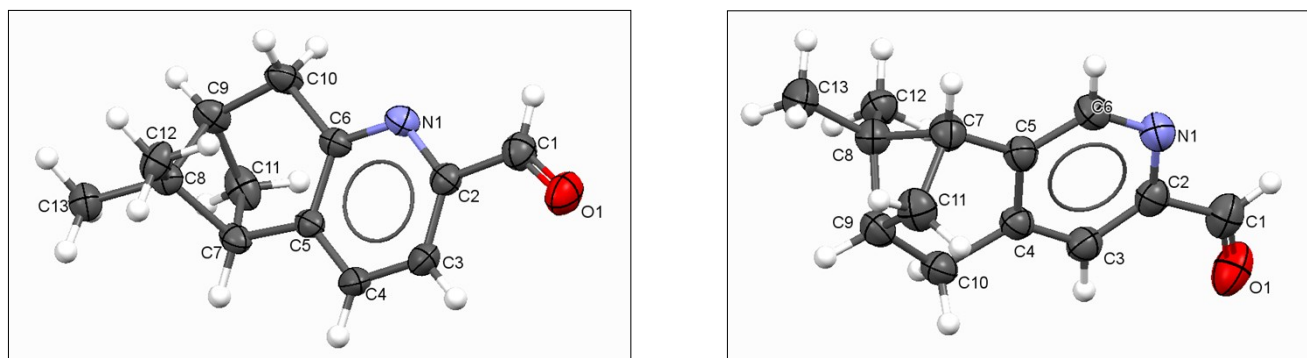

Figure S2.1 Molecular structure of chiral aldehydes, **P1** (left) and **P2** (right) with appropriate labelling scheme. Thermal ellipsoids are plotted at 50%.

Table S2.1 Selected geometric parameters for **P1** (Å, °)

| Bond      | Length (Å)  | Bond       | Length (Å)  |
|-----------|-------------|------------|-------------|
| C1—O1     | 1.203 (3)   | C6—C10     | 1.504 (2)   |
| C1—C2     | 1.473 (3)   | C7—C11     | 1.543 (3)   |
| C2—N1     | 1.344 (3)   | C7—C8      | 1.560 (3)   |
| C2—C3     | 1.375 (3)   | C8—C12     | 1.513 (3)   |
| C3—C4     | 1.381 (3)   | C8—C13     | 1.526 (2)   |
| C4—C5     | 1.377 (3)   | C8—C9      | 1.559 (3)   |
| C5—C6     | 1.407 (2)   | C9—C10     | 1.526 (3)   |
| C5—C7     | 1.498 (3)   | C9—C11     | 1.534 (4)   |
| C6—N1     | 1.326 (2)   |            |             |
| Bond      | Angle (°)   | Bond       | Angle (°)   |
| O1—C1—C2  | 125.4 (2)   | C11—C7—C8  | 87.11 (16)  |
| N1—C2—C3  | 123.51 (18) | C12—C8—C13 | 108.80 (17) |
| N1—C2—C1  | 115.15 (17) | C12—C8—C9  | 118.90 (17) |
| C3—C2—C1  | 121.33 (18) | C13—C8—C9  | 111.62 (15) |
| C2—C3—C4  | 118.48 (19) | C12—C8—C7  | 118.51 (16) |
| C5—C4—C3  | 119.47 (17) | C13—C8—C7  | 112.38 (15) |
| C4—C5—C6  | 117.98 (17) | C9—C8—C7   | 85.01 (15)  |
| C4—C5—C7  | 125.65 (16) | C10—C9—C11 | 108.30 (19) |
| C6—C5—C7  | 116.37 (17) | C10—C9—C8  | 112.07 (16) |
| N1—C6—C5  | 122.96 (16) | C11—C9—C8  | 87.45 (15)  |
| N1—C6—C10 | 119.10 (14) | C6—C10—C9  | 110.89 (15) |
| C5—C6—C10 | 117.94 (16) | C9—C11—C7  | 86.42 (16)  |
| C5—C7—C11 | 107.30 (15) | C6—N1—C2   | 117.55 (15) |
| C5—C7—C8  | 109.93 (14) |            |             |

Table S2.2 Selected geometric parameters for **P2** (Å, °)



| Bond      | Length (Å) | Bond       | Length (Å) |
|-----------|------------|------------|------------|
| C1—O1     | 1.199 (5)  | C6—N1      | 1.329 (5)  |
| C1—C2     | 1.468 (5)  | C7—C11     | 1.551 (5)  |
| C2—N1     | 1.344 (5)  | C7—C8      | 1.568 (5)  |
| C2—C3     | 1.380 (5)  | C8—C12     | 1.514 (6)  |
| C3—C4     | 1.379 (5)  | C8—C13     | 1.522 (5)  |
| C4—C5     | 1.404 (5)  | C8—C9      | 1.560 (5)  |
| C4—C10    | 1.506 (5)  | C9—C10     | 1.519 (5)  |
| C5—C6     | 1.386 (5)  | C9—C11     | 1.542 (6)  |
| C5—C7     | 1.486 (5)  |            |            |
| Bond      | Angle (°)  | Bond       | Angle (°)  |
| O1—C1—C2  | 125.4 (4)  | C11—C7—C8  | 87.3 (3)   |
| N1—C2—C3  | 123.5 (3)  | C12—C8—C13 | 109.1 (3)  |
| N1—C2—C1  | 114.2 (3)  | C12—C8—C9  | 118.3 (3)  |
| C3—C2—C1  | 122.3 (4)  | C13—C8—C9  | 112.4 (3)  |
| C4—C3—C2  | 119.9 (3)  | C12—C8—C7  | 119.3 (3)  |
| C3—C4—C5  | 117.4 (3)  | C13—C8—C7  | 111.1 (3)  |
| C3—C4—C10 | 124.8 (3)  | C9—C8—C7   | 84.9 (2)   |
| C5—C4—C10 | 117.8 (3)  | C10—C9—C11 | 108.7 (3)  |
| C6—C5—C4  | 118.3 (3)  | C10—C9—C8  | 111.3 (3)  |
| C6—C5—C7  | 125.0 (3)  | C11—C9—C8  | 88.0 (3)   |
| C4—C5—C7  | 116.7 (3)  | C4—C10—C9  | 110.9 (3)  |
| N1—C6—C5  | 124.6 (3)  | C9—C11—C7  | 86.0 (3)   |
| C5—C7—C11 | 106.8 (3)  | C6—N1—C2   | 116.4 (3)  |
| C5—C7—C8  | 110.2 (3)  |            |            |

**Table S2.3** Selected geometric parameters for **T2b** (Å, °)

| Bond   | Length (Å) | Bond      | Length (Å) |
|--------|------------|-----------|------------|
| C1—N2  | 1.440 (9)  | C8—C9     | 1.552 (11) |
| C1—N5  | 1.442 (8)  | C9—C11    | 1.521 (11) |
| C1—C2  | 1.509 (7)  | C9—C10    | 1.529 (9)  |
| C2—N1  | 1.340 (7)  | C14—O1    | 1.238 (6)  |
| C2—C3  | 1.366 (7)  | C14—N3    | 1.362 (9)  |
| C3—C4  | 1.383 (8)  | C14—N4    | 1.373 (8)  |
| C4—C5  | 1.391 (7)  | C15—N4    | 1.466 (8)  |
| C4—C10 | 1.519 (8)  | C15—C16   | 1.498 (10) |
| C5—C6  | 1.371 (7)  | C15—C17   | 1.526 (10) |
| C5—C7  | 1.491 (7)  | C15A—N3   | 1.467 (9)  |
| C6—N1  | 1.341 (7)  | C15A—C16A | 1.506 (10) |
| C7—C11 | 1.542 (11) | C15A—C17A | 1.521 (10) |
| C7—C8  | 1.566 (9)  | N2—N3     | 1.440 (7)  |
| C8—C12 | 1.509 (12) | N4—N5     | 1.430 (7)  |
| C8—C13 | 1.543 (9)  |           |            |

| Bond       | Angle (°) | Bond           | Angle (°) |
|------------|-----------|----------------|-----------|
| N2—C1—N5   | 114.0 (5) | C11—C9—C10     | 109.3 (6) |
| N2—C1—C2   | 109.6 (5) | C11—C9—C8      | 88.3 (6)  |
| N5—C1—C2   | 108.0 (5) | C10—C9—C8      | 111.1 (6) |
| N1—C2—C3   | 123.3 (5) | C4—C10—C9      | 110.3 (5) |
| N1—C2—C1   | 114.6 (5) | C9—C11—C7      | 86.3 (7)  |
| C3—C2—C1   | 122.1 (5) | O1—C14—N3      | 120.2 (7) |
| C2—C3—C4   | 119.5 (5) | O1—C14—N4      | 120.9 (7) |
| C3—C4—C5   | 118.5 (5) | N3—C14—N4      | 118.8 (5) |
| C3—C4—C10  | 123.7 (5) | N4—C15—C16     | 109.3 (6) |
| C5—C4—C10  | 117.7 (5) | N4—C15—C17     | 111.1 (6) |
| C6—C5—C4   | 117.5 (5) | C16—C15—C17    | 113.7 (7) |
| C6—C5—C7   | 125.7 (5) | N3—C15A—C16A   | 110.6 (6) |
| C4—C5—C7   | 116.8 (5) | N3—C15A—C17A   | 111.9 (6) |
| N1—C6—C5   | 124.9 (5) | C16A—C15A—C17A | 110.4 (7) |
| C5—C7—C11  | 107.0 (6) | C2—N1—C6       | 116.2 (4) |
| C5—C7—C8   | 110.3 (5) | C1—N2—N3       | 110.1 (5) |
| C11—C7—C8  | 87.1 (6)  | C14—N3—N2      | 121.8 (5) |
| C12—C8—C13 | 110.4 (8) | C14—N3—C15A    | 119.0 (6) |
| C12—C8—C9  | 119.4 (7) | N2—N3—C15A     | 112.3 (6) |
| C13—C8—C9  | 111.1 (7) | C14—N4—N5      | 119.7 (5) |
| C12—C8—C7  | 118.6 (6) | C14—N4—C15     | 119.4 (5) |
| C13—C8—C7  | 110.6 (6) | N5—N4—C15      | 113.2 (6) |
| C9—C8—C7   | 84.4 (6)  | N4—N5—C1       | 111.4 (5) |

**Table S2.4** Selected geometric parameters for **3b** (Å, °)

| Bond   | Length (Å) | Bond    | Length (Å) |
|--------|------------|---------|------------|
| C1—N5  | 1.32 (3)   | C24—C25 | 1.43 (4)   |
| C1—N2  | 1.38 (3)   | C24—C30 | 1.51 (4)   |
| C1—C2  | 1.48 (4)   | C25—C26 | 1.37 (4)   |
| C2—N1  | 1.30 (3)   | C25—C27 | 1.51 (3)   |
| C2—C3  | 1.44 (4)   | C26—N6  | 1.31 (4)   |
| C3—C4  | 1.38 (4)   | C27—C31 | 1.56 (3)   |
| C4—C5  | 1.39 (3)   | C27—C28 | 1.59 (3)   |
| C4—C10 | 1.52 (4)   | C28—C29 | 1.51 (3)   |
| C5—C6  | 1.38 (3)   | C28—C32 | 1.53 (3)   |
| C5—C7  | 1.50 (3)   | C28—C33 | 1.54 (3)   |
| C6—N1  | 1.40 (4)   | C29—C30 | 1.56 (3)   |
| C7—C8  | 1.54 (3)   | C29—C31 | 1.57 (4)   |
| C7—C11 | 1.60 (3)   | C34—O2  | 1.21 (3)   |
| C8—C12 | 1.52 (4)   | C34—N9  | 1.35 (4)   |
| C8—C13 | 1.54 (3)   | C34—N8  | 1.44 (4)   |
| C8—C9  | 1.58 (3)   | C35—N9  | 1.44 (3)   |
| C9—C10 | 1.51 (3)   | C35—C37 | 1.51 (3)   |

|             |                  |                |                  |
|-------------|------------------|----------------|------------------|
| C9—C11      | 1.52 (4)         | C35—C36        | 1.54 (3)         |
| C14—O1      | 1.23 (3)         | C35A—N8        | 1.48 (4)         |
| C14—N3      | 1.34 (4)         | C35A—C37A      | 1.51 (4)         |
| C14—N4      | 1.41 (4)         | C35A—C36A      | 1.52 (4)         |
| C15—N4      | 1.50 (3)         | Cl1—Cu1        | 2.204 (9)        |
| C15—C16     | 1.51 (4)         | Cl2—Cu1        | 2.210 (9)        |
| C15—C17     | 1.54 (3)         | Cl3—Cu2        | 2.226 (9)        |
| C15A—C17A   | 1.48 (4)         | Cl4—Cu2        | 2.186 (9)        |
| C15A—N3     | 1.48 (3)         | Cu1—N2         | 1.96 (2)         |
| C15A—C16A   | 1.58 (4)         | Cu1—N1         | 2.00 (2)         |
| C21—N10     | 1.29 (3)         | Cu2—N7         | 1.97 (2)         |
| C21—N7      | 1.36 (3)         | Cu2—N6         | 1.98 (2)         |
| C21—C22     | 1.52 (4)         | N2—N3          | 1.36 (3)         |
| C22—C23     | 1.32 (4)         | N4—N5          | 1.32 (3)         |
| C22—N6      | 1.37 (3)         | N7—N8          | 1.36 (3)         |
| C23—C24     | 1.36 (4)         | N9—N10         | 1.38 (3)         |
| <b>Bond</b> | <b>Angle (°)</b> | <b>Bond</b>    | <b>Angle (°)</b> |
| N5—C1—N2    | 127 (2)          | C32—C28—C33    | 110 (2)          |
| N5—C1—C2    | 119 (3)          | C29—C28—C27    | 85.7 (17)        |
| N2—C1—C2    | 114 (3)          | C32—C28—C27    | 115 (2)          |
| N1—C2—C3    | 125 (3)          | C33—C28—C27    | 109.6 (18)       |
| N1—C2—C1    | 111 (3)          | C28—C29—C30    | 111.8 (18)       |
| C3—C2—C1    | 124 (3)          | C28—C29—C31    | 90 (2)           |
| C4—C3—C2    | 116 (3)          | C30—C29—C31    | 107 (2)          |
| C3—C4—C5    | 120 (3)          | C24—C30—C29    | 111 (2)          |
| C3—C4—C10   | 119 (2)          | C27—C31—C29    | 84.2 (18)        |
| C5—C4—C10   | 121 (3)          | O2—C34—N9      | 127 (3)          |
| C6—C5—C4    | 121 (2)          | O2—C34—N8      | 118 (3)          |
| C6—C5—C7    | 123 (2)          | N9—C34—N8      | 115 (3)          |
| C4—C5—C7    | 116 (2)          | N9—C35—C37     | 110 (2)          |
| C5—C6—N1    | 120 (2)          | N9—C35—C36     | 105 (2)          |
| C5—C7—C8    | 110.3 (18)       | C37—C35—C36    | 113 (3)          |
| C5—C7—C11   | 106.9 (18)       | N8—C35A—C37A   | 111 (2)          |
| C8—C7—C11   | 84.7 (18)        | N8—C35A—C36A   | 110 (2)          |
| C12—C8—C13  | 106 (2)          | C37A—C35A—C36A | 111 (2)          |
| C12—C8—C7   | 118 (2)          | N2—Cu1—N1      | 80.8 (8)         |
| C13—C8—C7   | 114 (2)          | N2—Cu1—Cl1     | 93.3 (7)         |
| C12—C8—C9   | 118 (2)          | N1—Cu1—Cl1     | 129.9 (8)        |
| C13—C8—C9   | 114.0 (18)       | N2—Cu1—Cl2     | 142.8 (7)        |
| C7—C8—C9    | 86.6 (16)        | N1—Cu1—Cl2     | 102.5 (7)        |
| C10—C9—C11  | 113 (2)          | Cl1—Cu1—Cl2    | 110.7 (3)        |
| C10—C9—C8   | 110.9 (18)       | N7—Cu2—N6      | 81.9 (10)        |
| C11—C9—C8   | 86.3 (18)        | N7—Cu2—Cl4     | 143.6 (6)        |
| C9—C11—C7   | 86.9 (19)        | N6—Cu2—Cl4     | 98.2 (8)         |
| C9—C10—C4   | 109 (2)          | N7—Cu2—Cl3     | 94.1 (7)         |

|                |            |             |            |
|----------------|------------|-------------|------------|
| O1—C14—N3      | 126 (3)    | N6—Cu2—Cl3  | 133.2 (7)  |
| O1—C14—N4      | 118 (3)    | Cl4—Cu2—Cl3 | 110.8 (3)  |
| N3—C14—N4      | 115 (3)    | C2—N1—C6    | 118 (3)    |
| N4—C15—C16     | 108 (2)    | C2—N1—Cu1   | 114 (2)    |
| N4—C15—C17     | 110 (2)    | C6—N1—Cu1   | 127.9 (18) |
| C16—C15—C17    | 114 (3)    | N3—N2—C1    | 112 (2)    |
| C17A—C15A—N3   | 115 (2)    | N3—N2—Cu1   | 126.1 (17) |
| C17A—C15A—C16A | 109 (3)    | C1—N2—Cu1   | 105.3 (17) |
| N3—C15A—C16A   | 106 (2)    | C14—N3—N2   | 125 (2)    |
| N10—C21—N7     | 131 (3)    | C14—N3—C15A | 118 (2)    |
| N10—C21—C22    | 118 (3)    | N2—N3—C15A  | 117 (2)    |
| N7—C21—C22     | 110 (3)    | N5—N4—C14   | 122 (3)    |
| C23—C22—N6     | 123 (3)    | N5—N4—C15   | 115 (2)    |
| C23—C22—C21    | 123 (3)    | C14—N4—C15  | 123 (2)    |
| N6—C22—C21     | 113 (3)    | N4—N5—C1    | 117 (2)    |
| C22—C23—C24    | 121 (3)    | C26—N6—C22  | 117 (3)    |
| C23—C24—C25    | 117 (3)    | C26—N6—Cu2  | 130 (2)    |
| C23—C24—C30    | 126 (3)    | C22—N6—Cu2  | 112 (2)    |
| C25—C24—C30    | 117 (3)    | N8—N7—C21   | 113 (2)    |
| C26—C25—C24    | 118 (3)    | N8—N7—Cu2   | 124 (2)    |
| C26—C25—C27    | 125 (2)    | C21—N7—Cu2  | 109.1 (18) |
| C24—C25—C27    | 116 (3)    | N7—N8—C34   | 122 (3)    |
| N6—C26—C25     | 124 (3)    | N7—N8—C35A  | 121 (2)    |
| C25—C27—C31    | 106 (2)    | C34—N8—C35A | 117 (2)    |
| C25—C27—C28    | 110.3 (17) | C34—N9—N10  | 125 (3)    |
| C31—C27—C28    | 87 (2)     | C34—N9—C35  | 117 (2)    |
| C29—C28—C32    | 121 (2)    | N10—N9—C35  | 117 (2)    |
| C29—C28—C33    | 113.9 (19) | C21—N10—N9  | 113 (2)    |

---

### S3 Selective analytical data

#### S3.1 <sup>1</sup>H NMR data

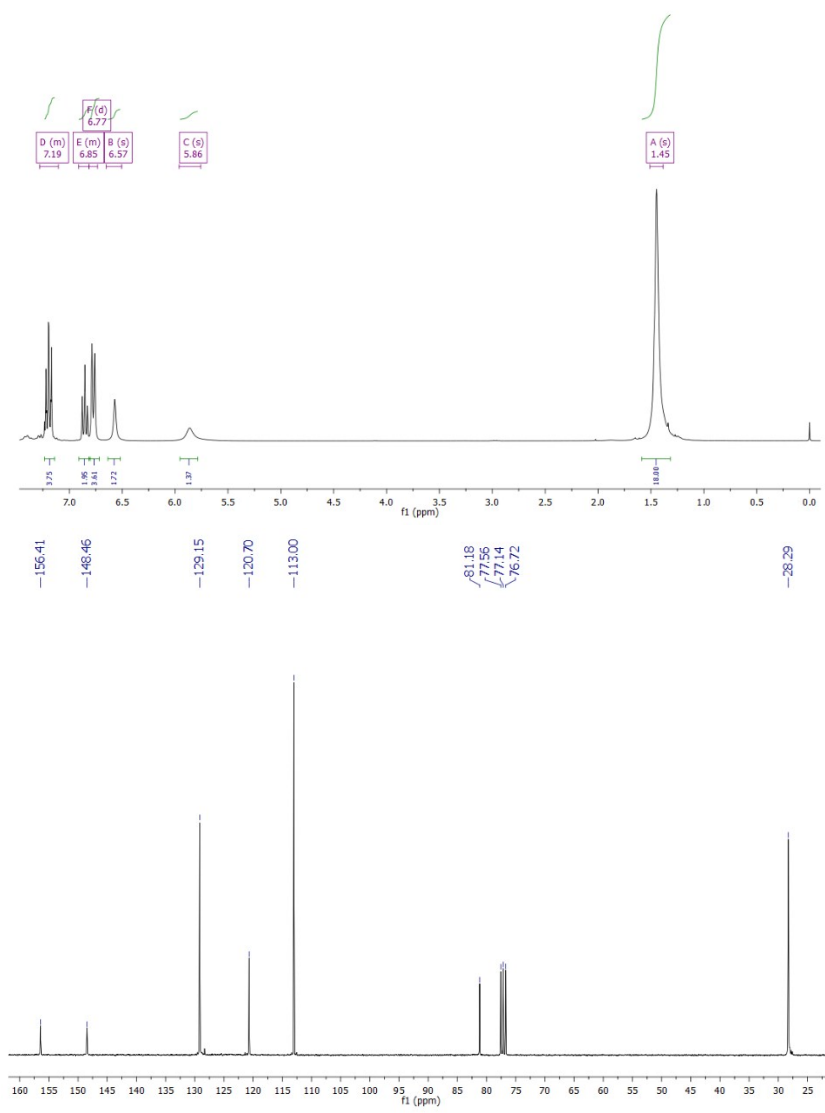

Figure S3.1.1. <sup>1</sup>H NMR (top) and <sup>13</sup>C-NMR (bottom) of Boc2 in CDCl<sub>3</sub>.

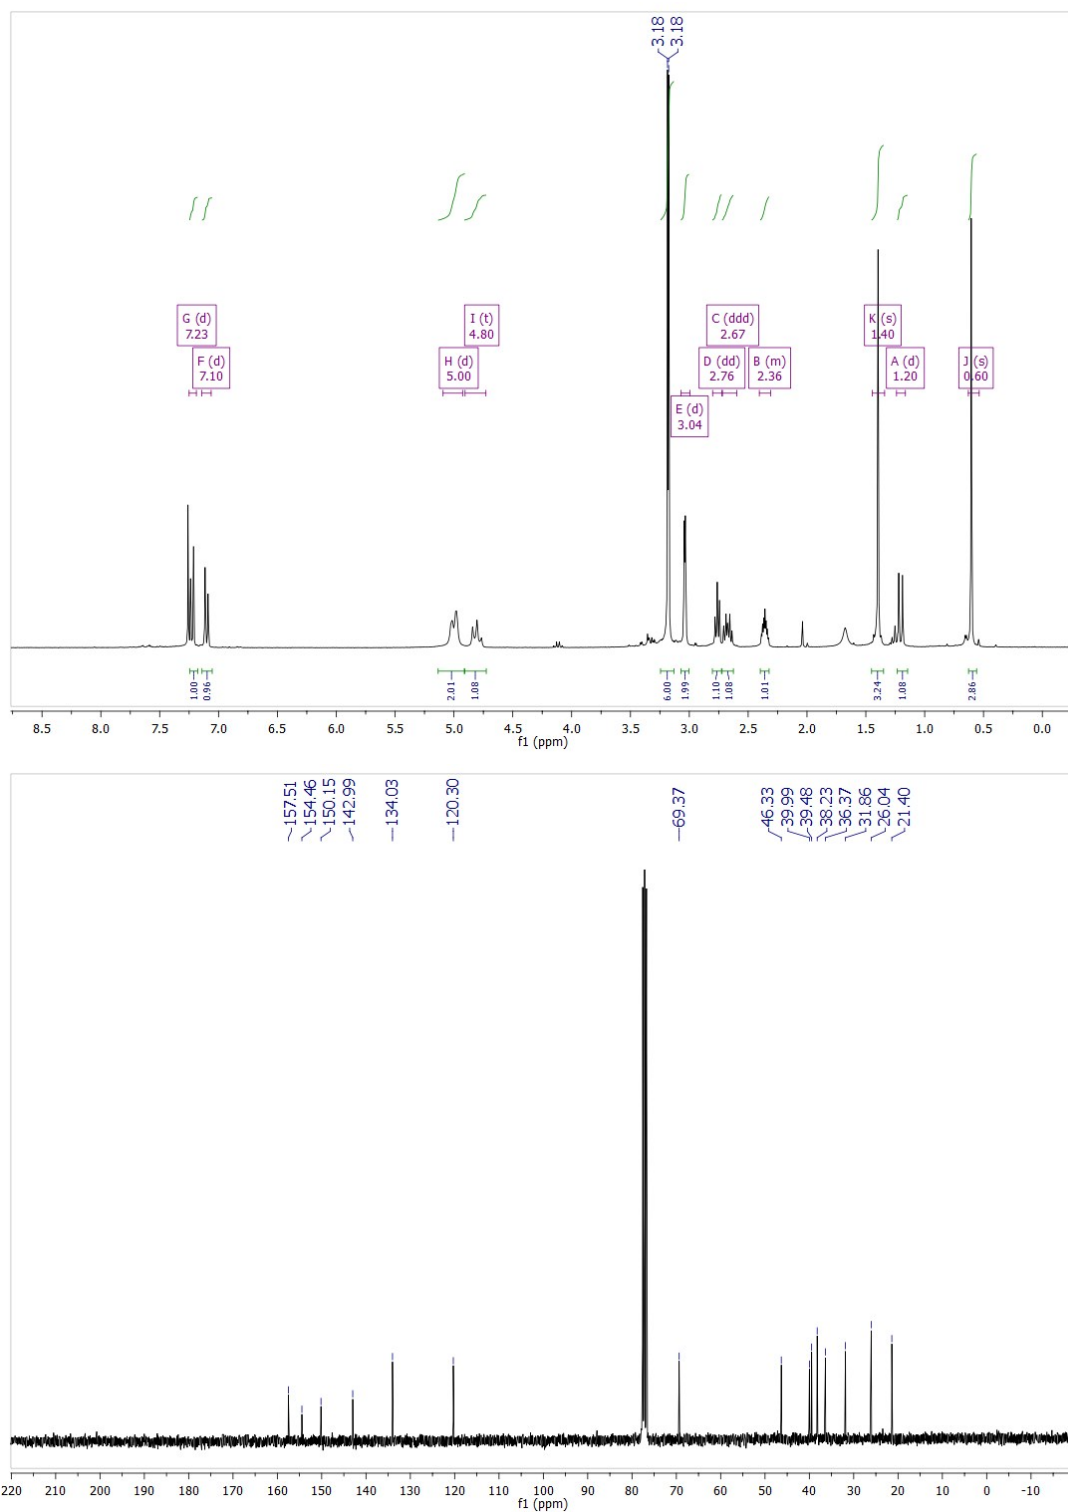

Figure S3.1.2. <sup>1</sup>H NMR (top) and <sup>13</sup>C-NMR (bottom) of T1a in CDCl<sub>3</sub>.

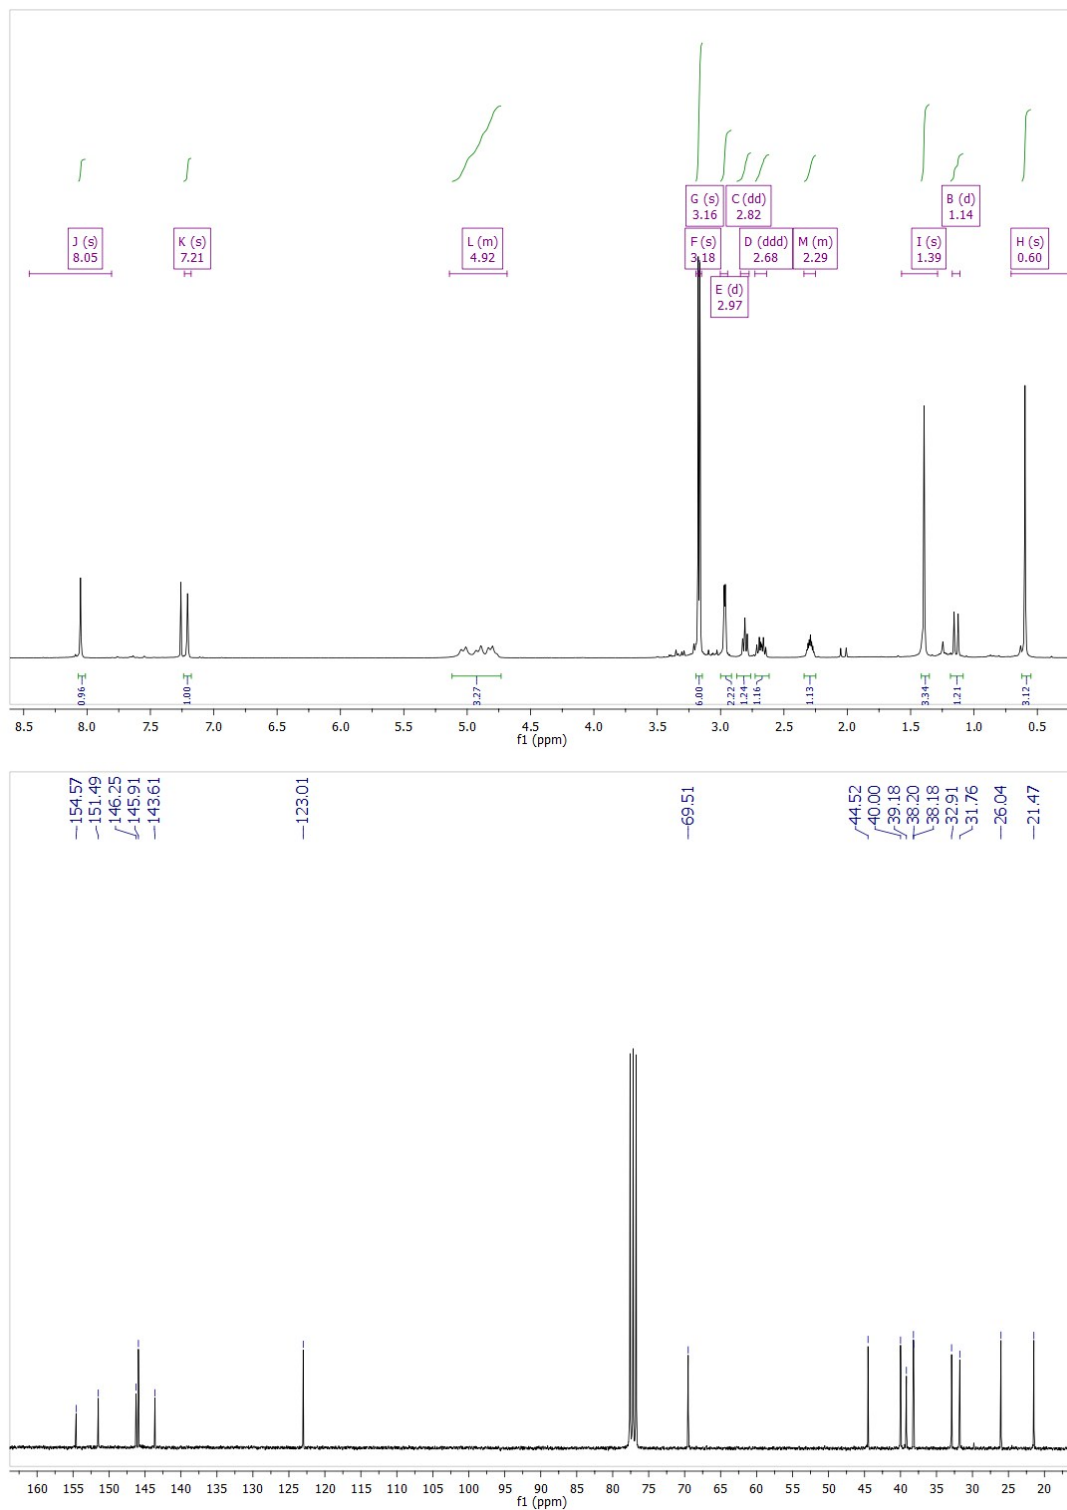

Figure S3.1.3. <sup>1</sup>H NMR (top) and <sup>13</sup>C-NMR (bottom) of T2a in CDCl<sub>3</sub>.

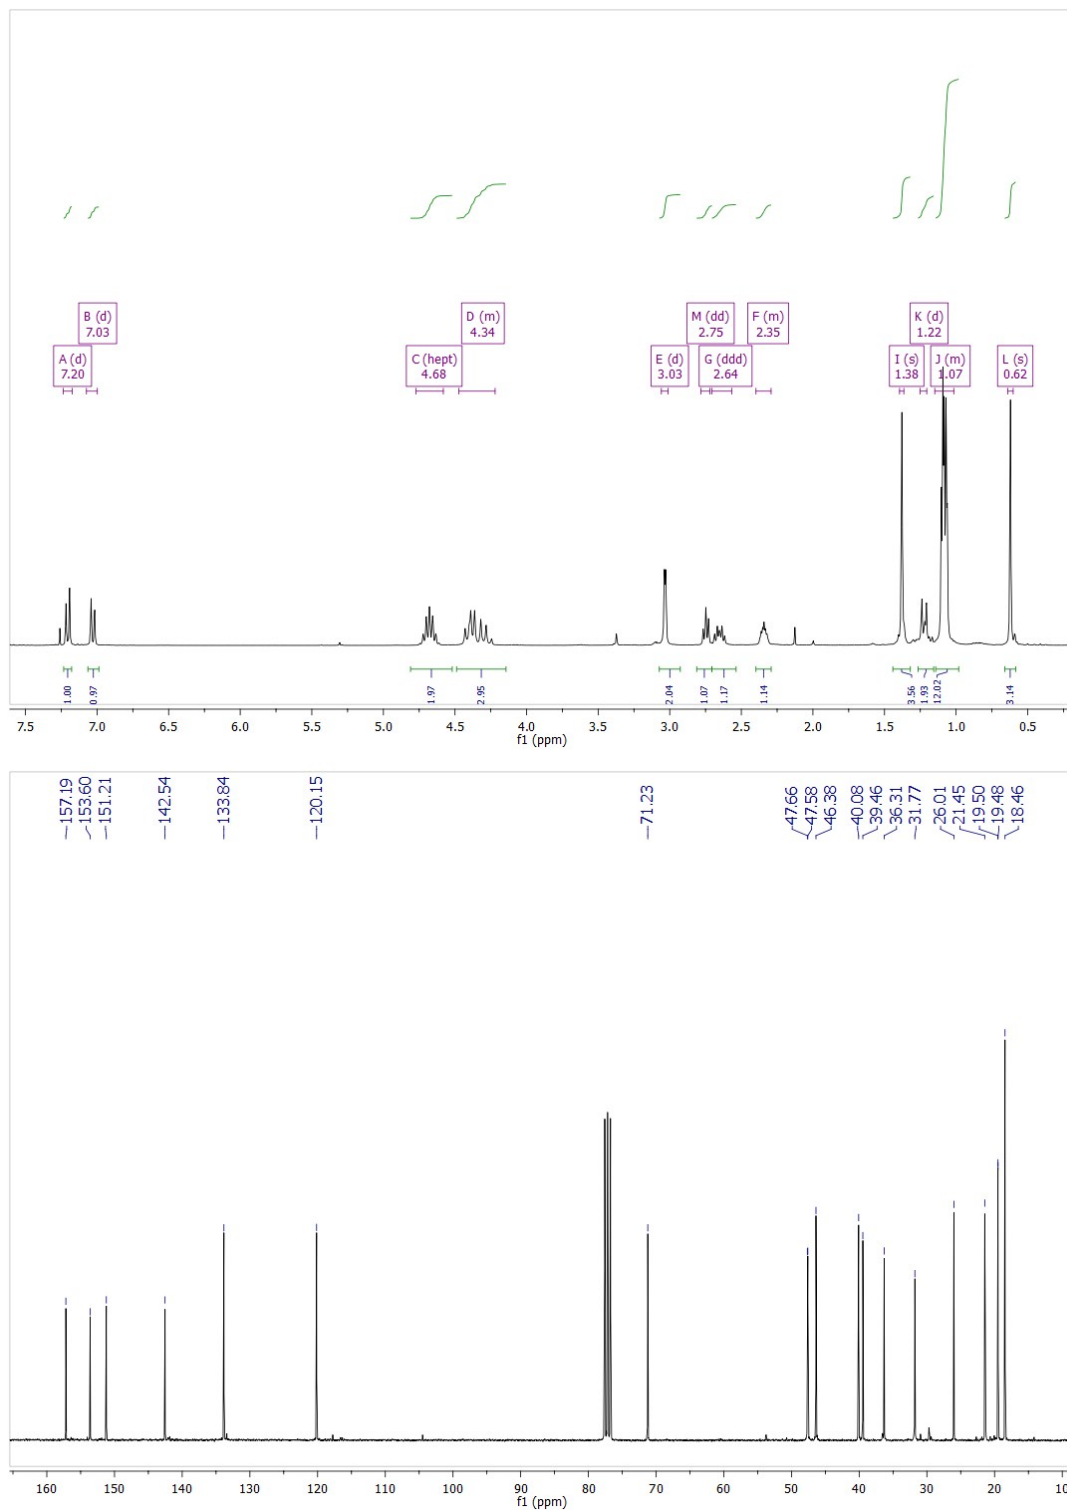

Figure S3.1.4. <sup>1</sup>H NMR (top) and <sup>13</sup>C-NMR (bottom) of **T1b** in CDCl<sub>3</sub>.



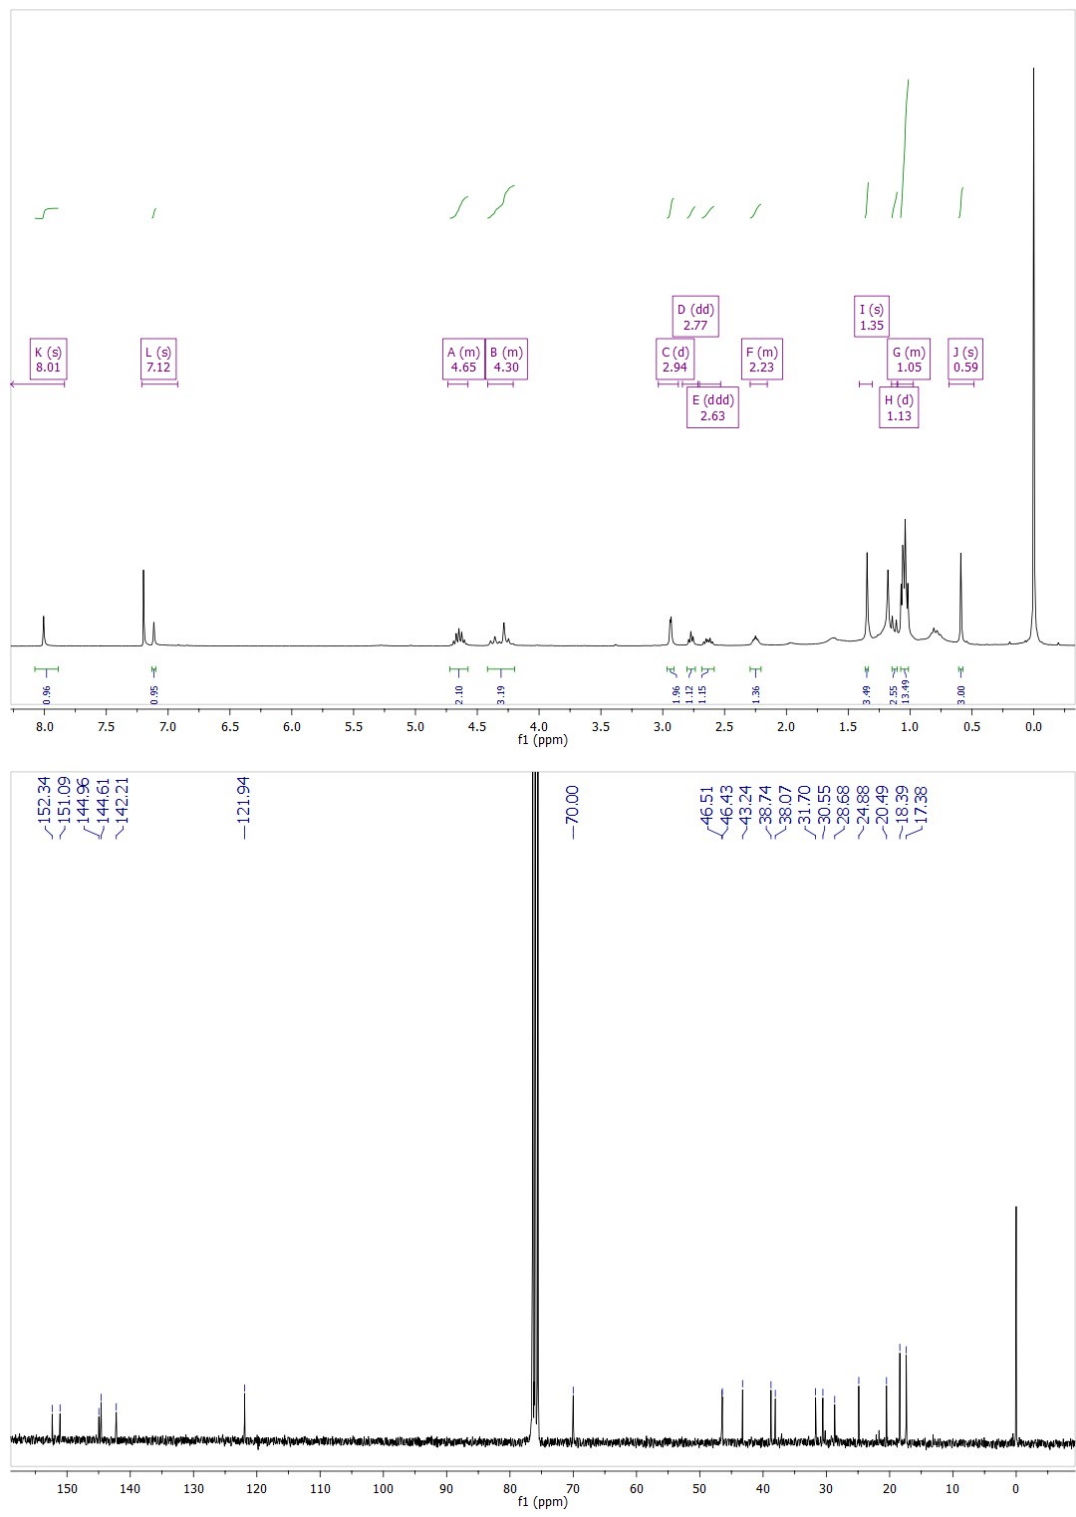

Figure S3.1.5. <sup>1</sup>H NMR (top) and <sup>13</sup>C-NMR (bottom) of T2b in CDCl<sub>3</sub>.

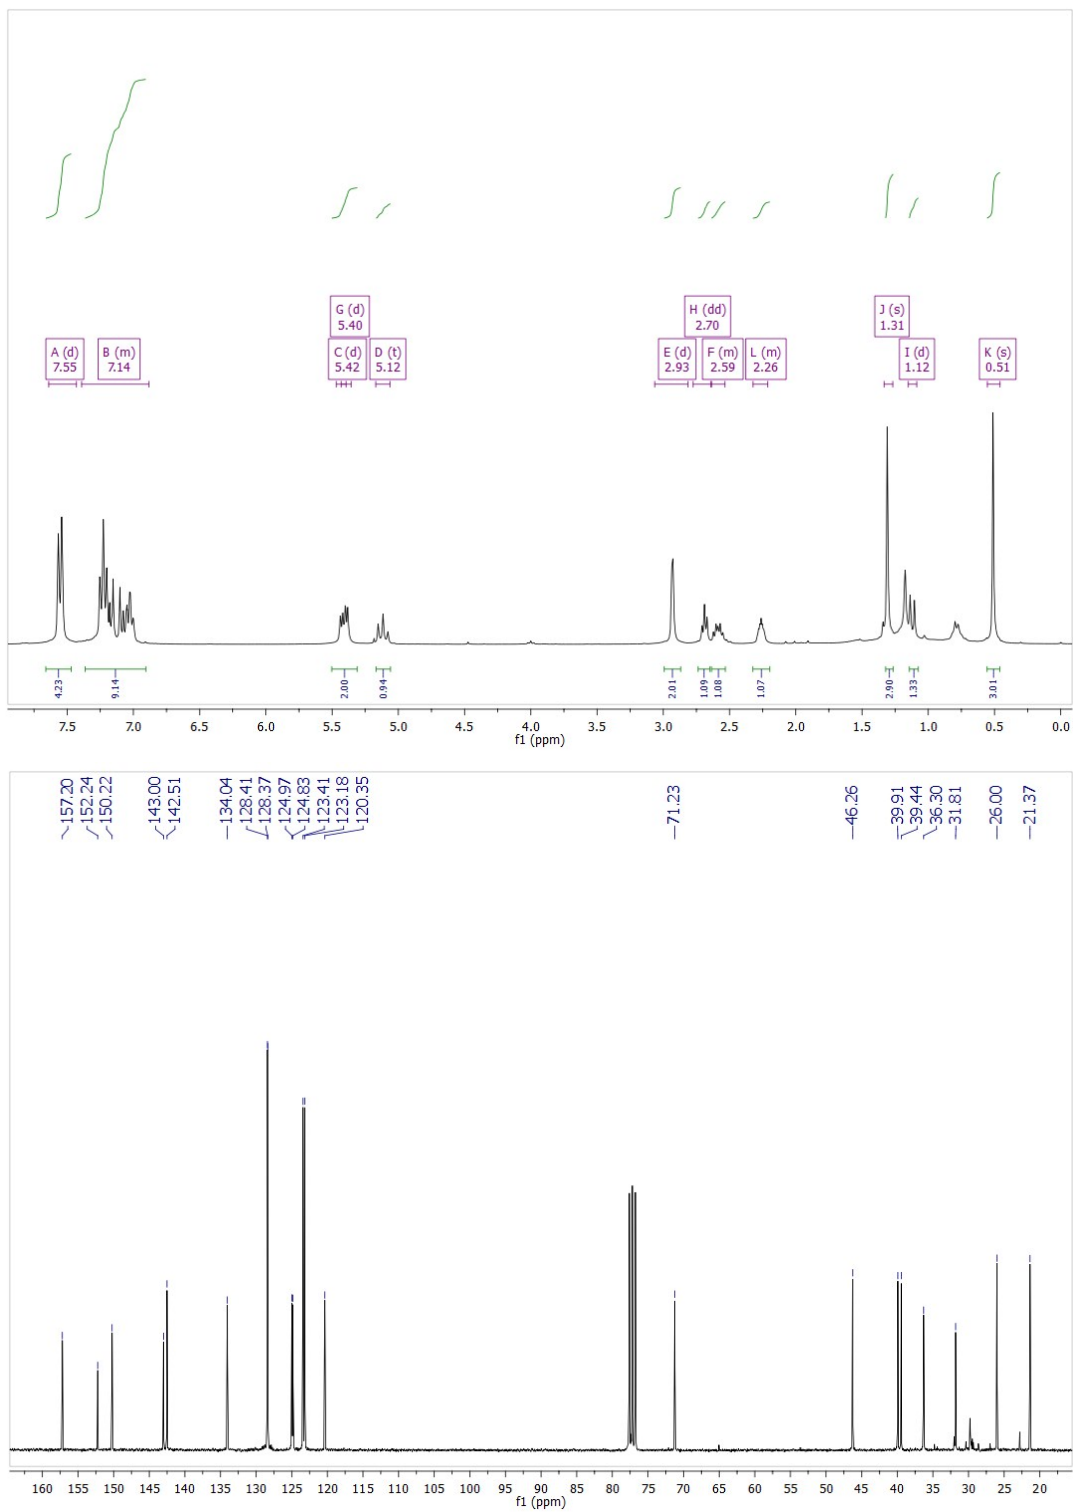

Figure S3.1.6. <sup>1</sup>H NMR (top) and <sup>13</sup>C-NMR (bottom) of T1c in CDCl<sub>3</sub>.

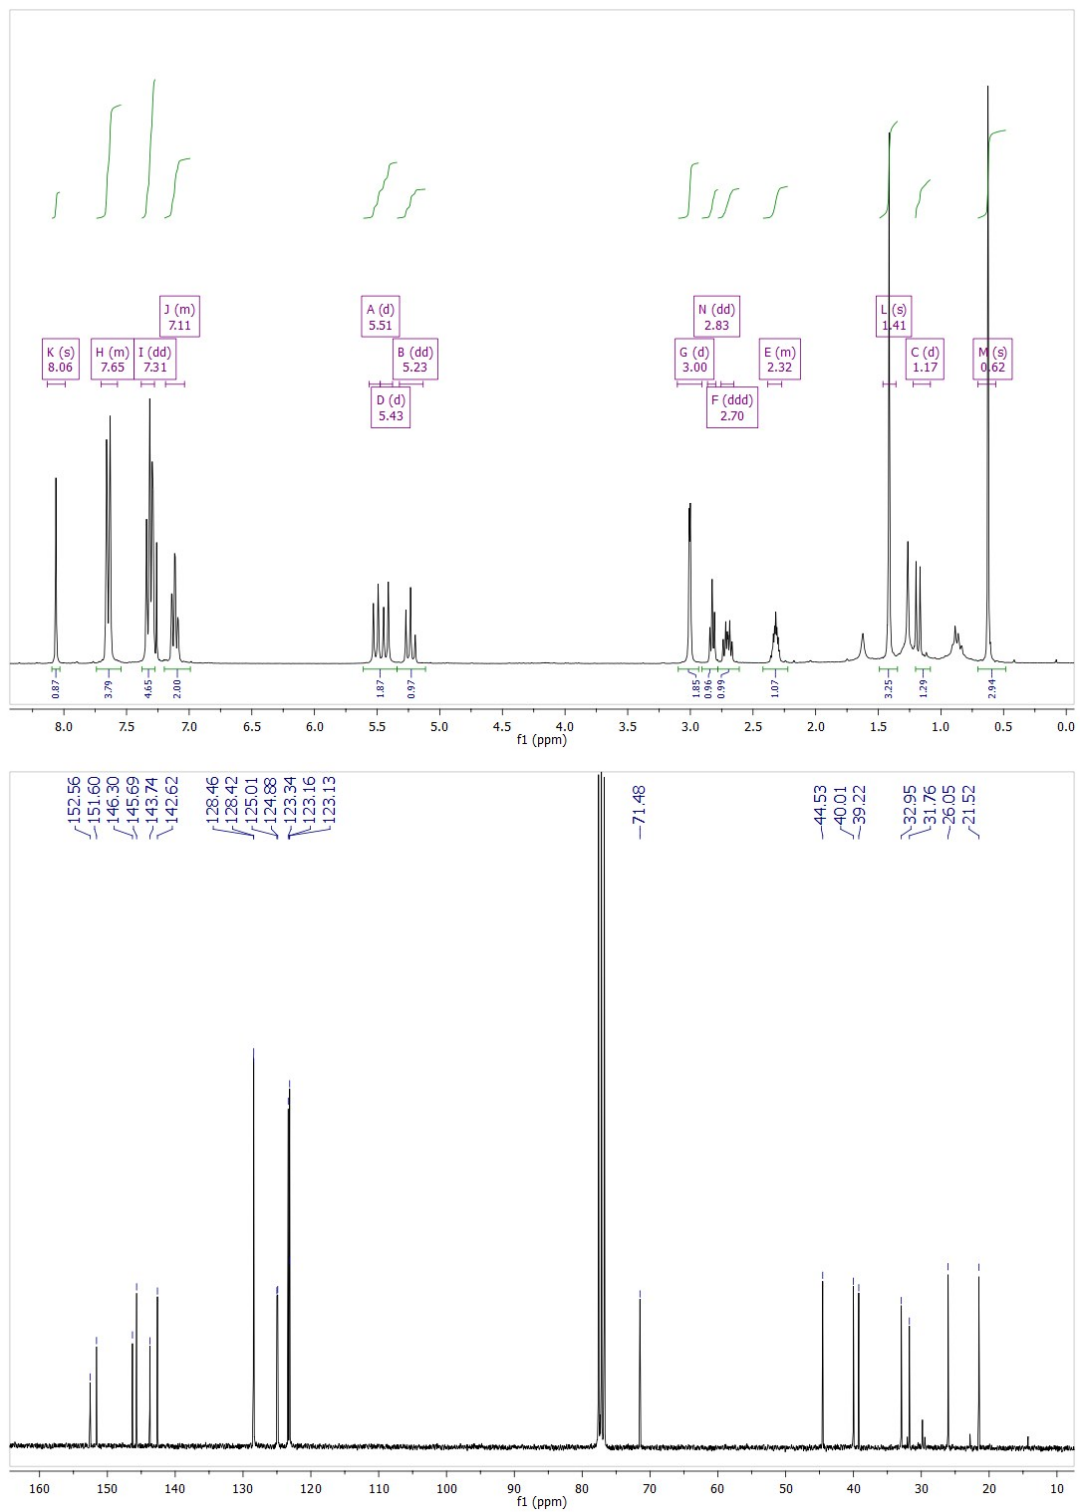

Figure S3.1.7. <sup>1</sup>H NMR (top) and <sup>13</sup>C-NMR (bottom) of T2c in CDCl<sub>3</sub>.

### S 3.2 IR Spectroscopy Data

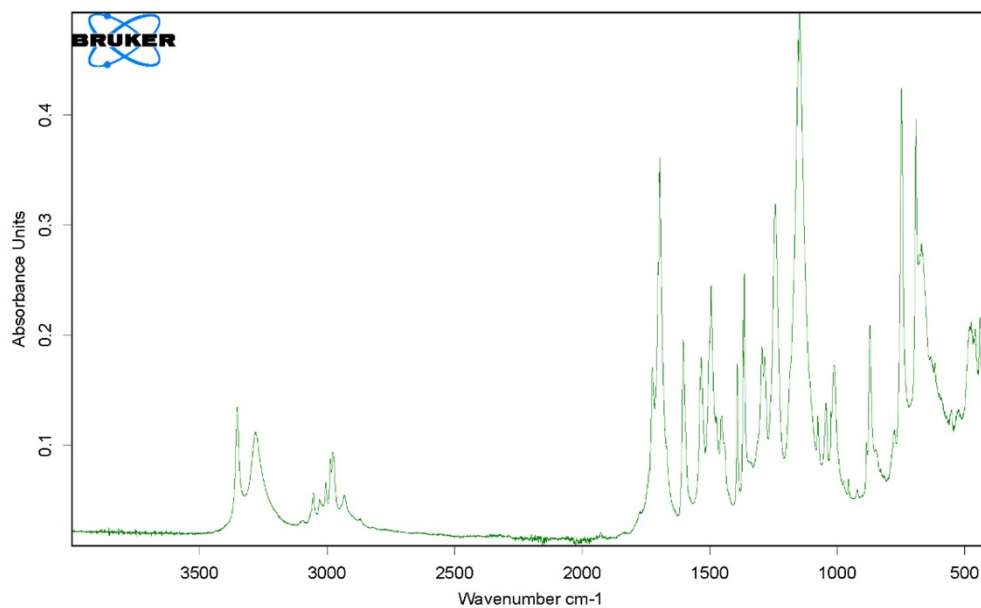

Figure S3.2.1. IR data for Boc2

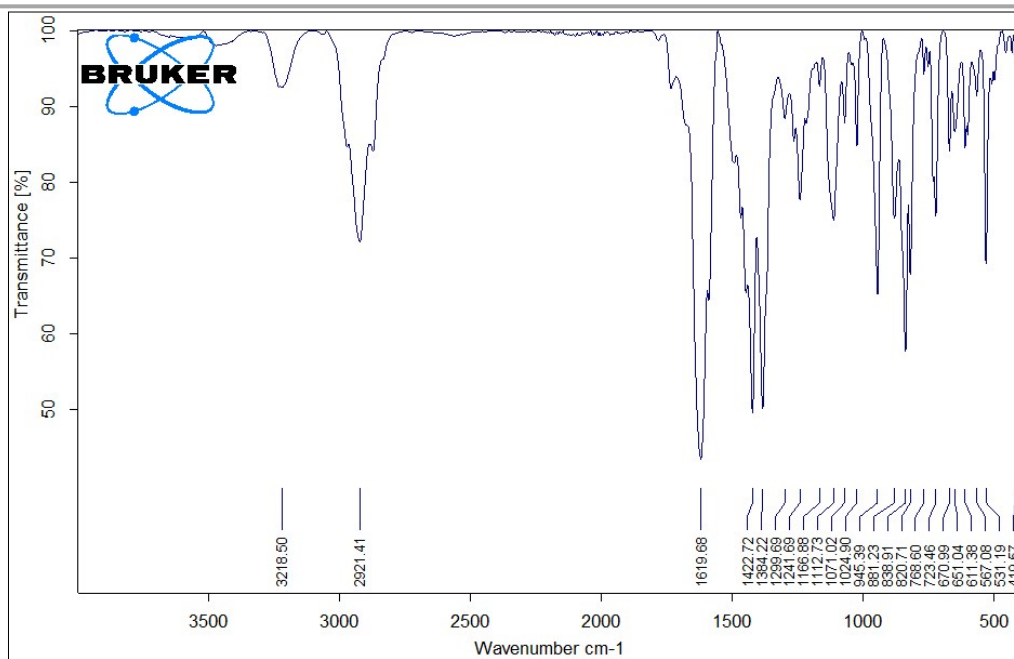

Figure S3.2.2. IR data for tetrazinanone T1a

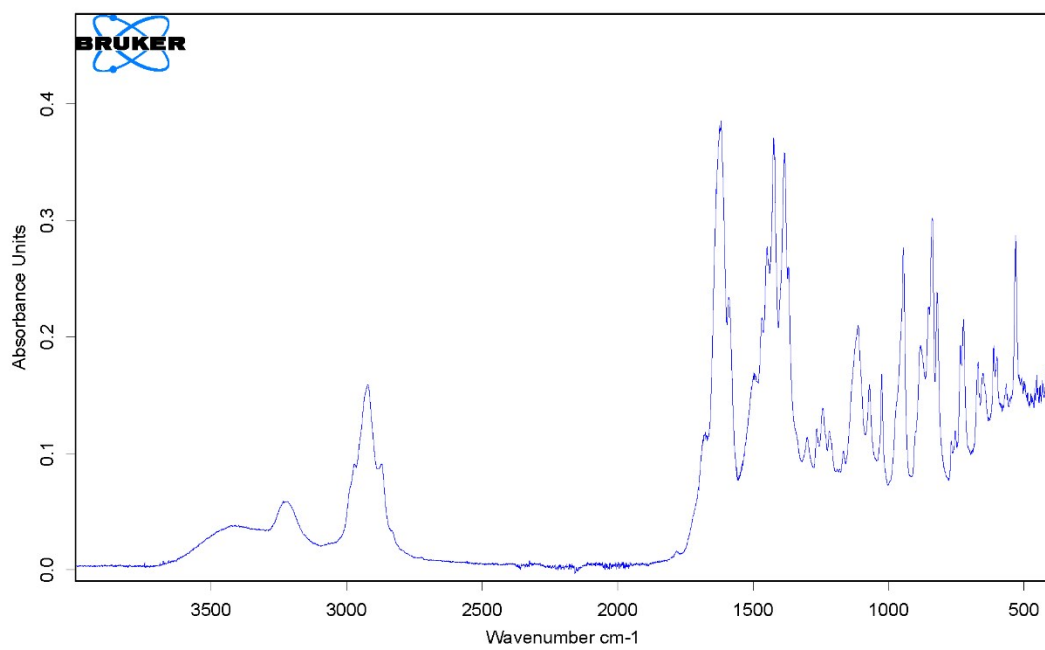

Figure S3.2.3. IR data for tetrazinanone T2a

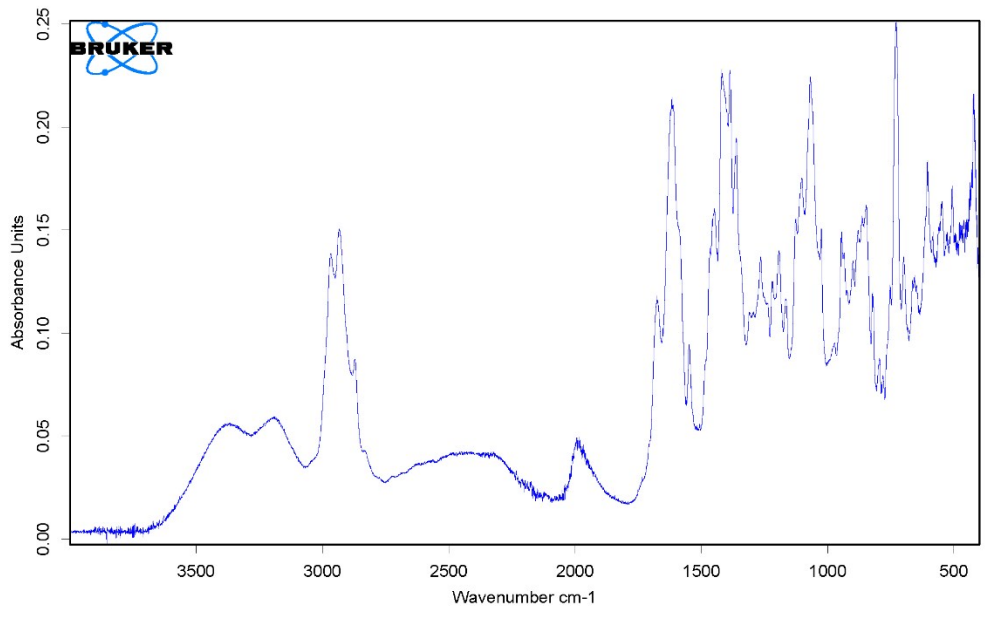

Figure S3.2.4. IR data for tetrazinanone T1b

---

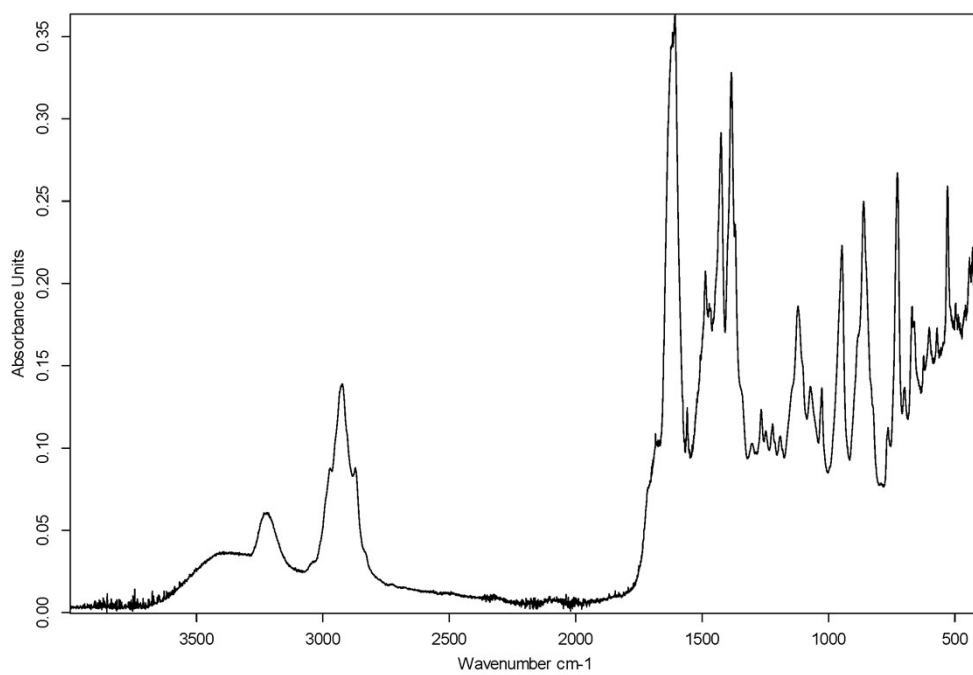

Figure S3.2.5. IR data for tetrazinanone T2b

---

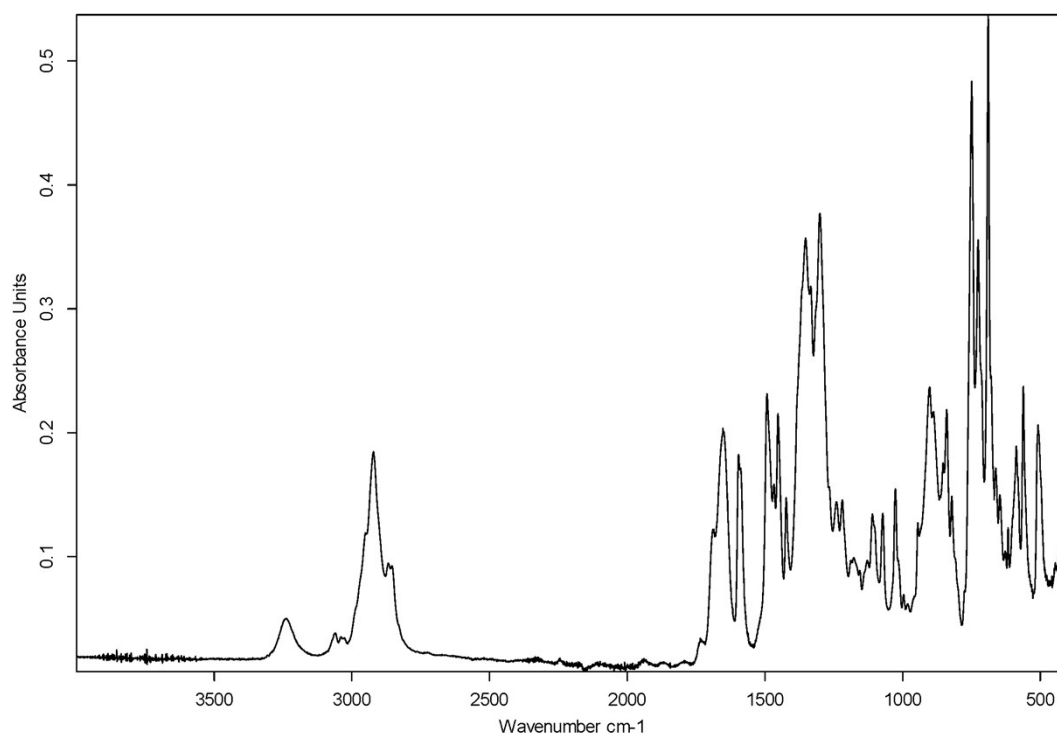

Figure S3.2.6. IR data for tetrazinanone T1c

---

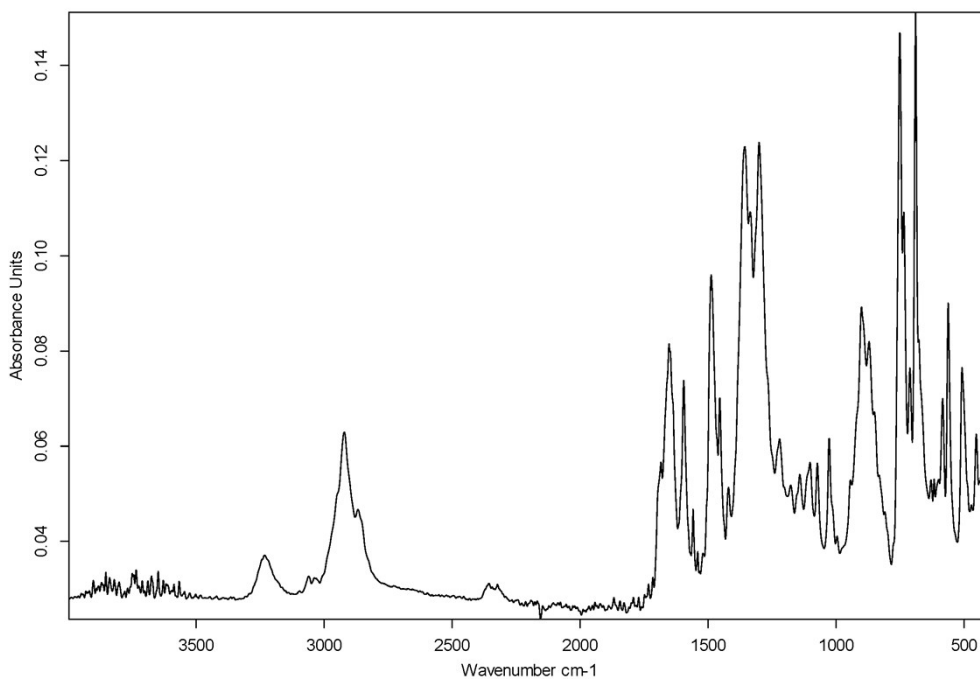

Figure S3.2.7. IR data for tetrazinanone T2c

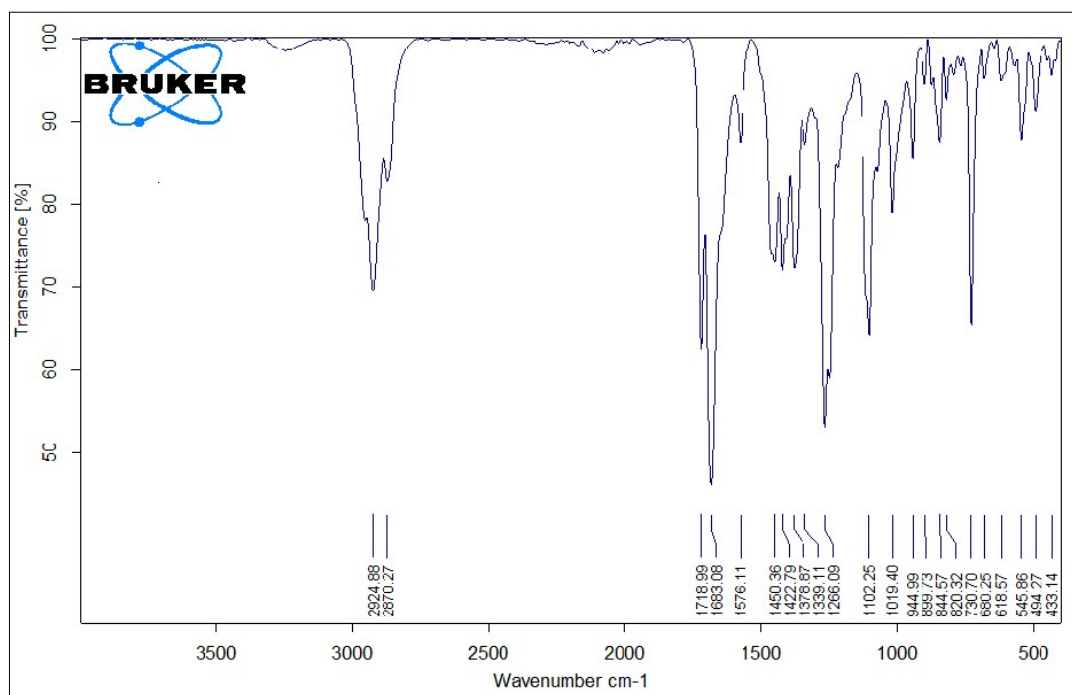

Figure S3.3.9. IR data for the verdazyl radical 1a



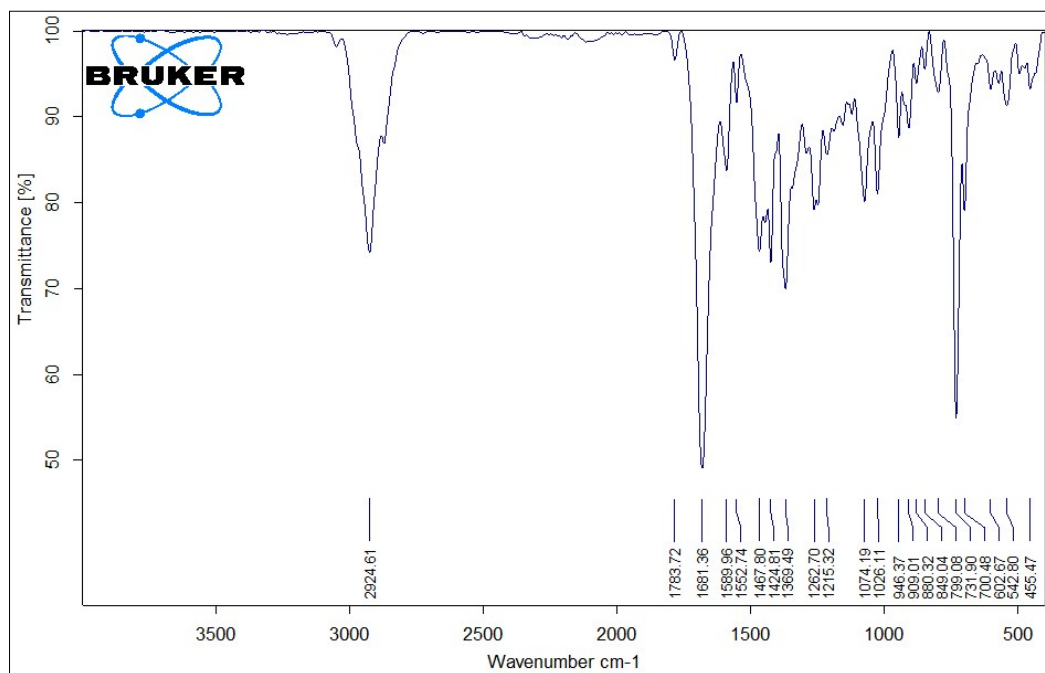

Figure S3.3.10. IR data for the verdazyl radicals 2a

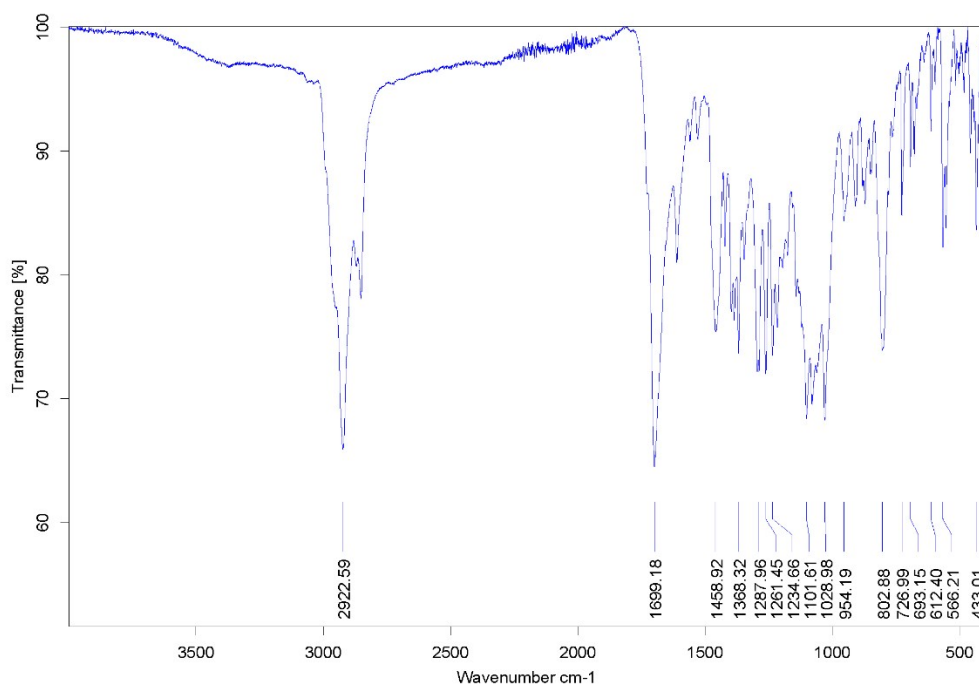

Figure S3.3.11. IR data for the Cu(II) complex 3b

### S3.3 UV-Vis spectroscopy data

The UV-Vis spectra show a broad band between 310-440 nm, which is typical for verdazyl radicals, most likely corresponding to internal  $\pi$ - $\pi^*$  transitions. This band shows a bathochromic shift from 350 nm, for the dimethyl substituted (**1a** and **2a**), to about 360 nm for the diphenyl substituted (**1c** and **2c**), to 410 nm for the diisopropyl substituted (**1b** and **2b**) verdazyls. These values are in accordance with the values found in the literature for similar compounds.<sup>[15]</sup> In the case of the verdazyl radical **1a** which is complexed with benzoquinone, a larger bathochromic shift is noticeable.

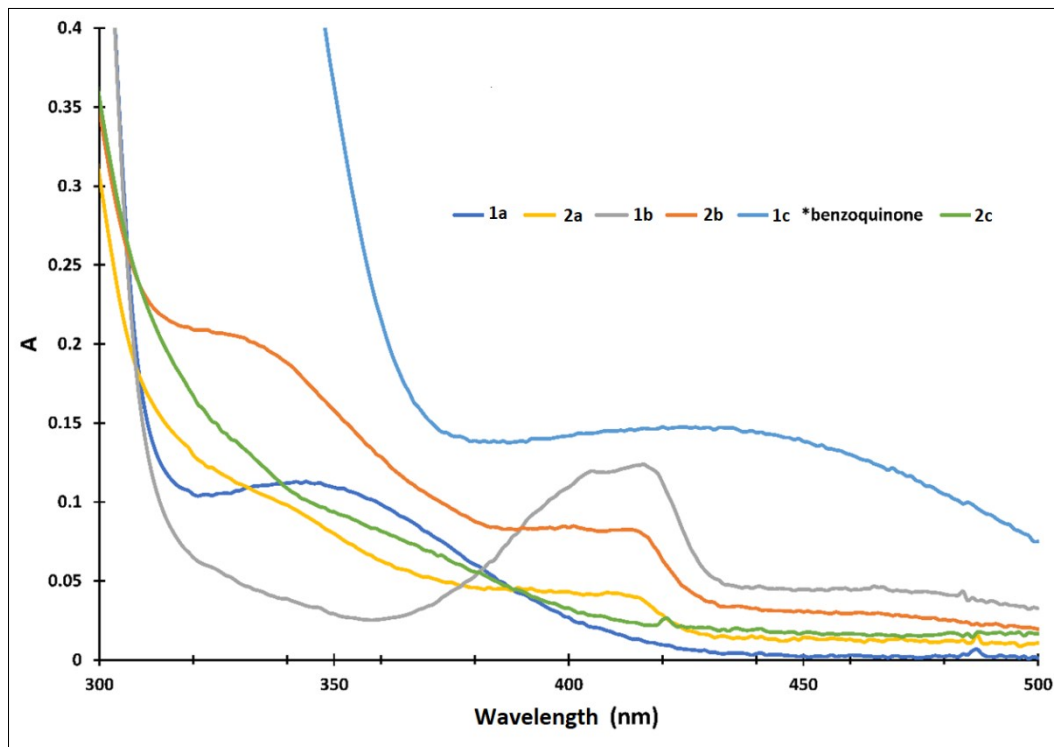

Figure S3.4 UV-Vis spectra for verdazyl radicals **1a** -**1c** and **2a** - **2c**.

### S 3.4 HRMS Data

XMASS Mass Analysis for /Data/EIF/WOLL1809\_ESI/1/pdata/1/massanal.res:  
XMASS Mass Analysis Constraints

Ion mass = 465.2108190

Charge = +1

| #                                      | C  | H  | N  | O | Na | mass        | DBE  | error     |
|----------------------------------------|----|----|----|---|----|-------------|------|-----------|
| *** Mass Analysis for mass 465.2108190 |    |    |    |   |    |             |      |           |
| 1                                      | 23 | 30 | 4  | 5 | 1  | 465.2108412 | 10.5 | 2.218e-05 |
| 2                                      | 22 | 31 | 3  | 8 | 0  | 465.2105664 | 9.0  | 2.526e-04 |
| 3                                      | 21 | 25 | 10 | 3 | 0  | 465.2105611 | 14.5 | 2.579e-04 |
| 4                                      | 23 | 27 | 7  | 4 | 0  | 465.2119038 | 14.0 | 1.085e-03 |
| 5                                      | 21 | 28 | 7  | 4 | 1  | 465.2094985 | 11.0 | 1.320e-03 |
| 6                                      | 24 | 26 | 8  | 1 | 1  | 465.2121786 | 15.5 | 1.360e-03 |
| 7                                      | 25 | 32 | 1  | 6 | 1  | 465.2121839 | 10.0 | 1.365e-03 |
| 8                                      | 20 | 29 | 6  | 7 | 0  | 465.2092237 | 9.5  | 1.595e-03 |
| 9                                      | 34 | 27 | 1  | 1 | 0  | 465.2087159 | 22.0 | 2.103e-03 |
| 10                                     | 25 | 29 | 4  | 5 | 0  | 465.2132465 | 13.5 | 2.427e-03 |

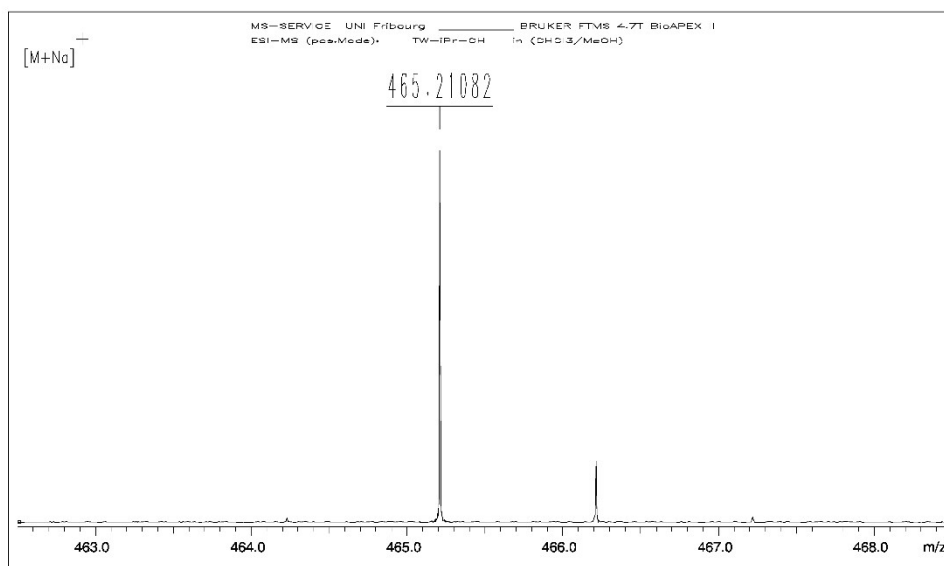

Figure S3.3.1. HRMS data for Boc2.

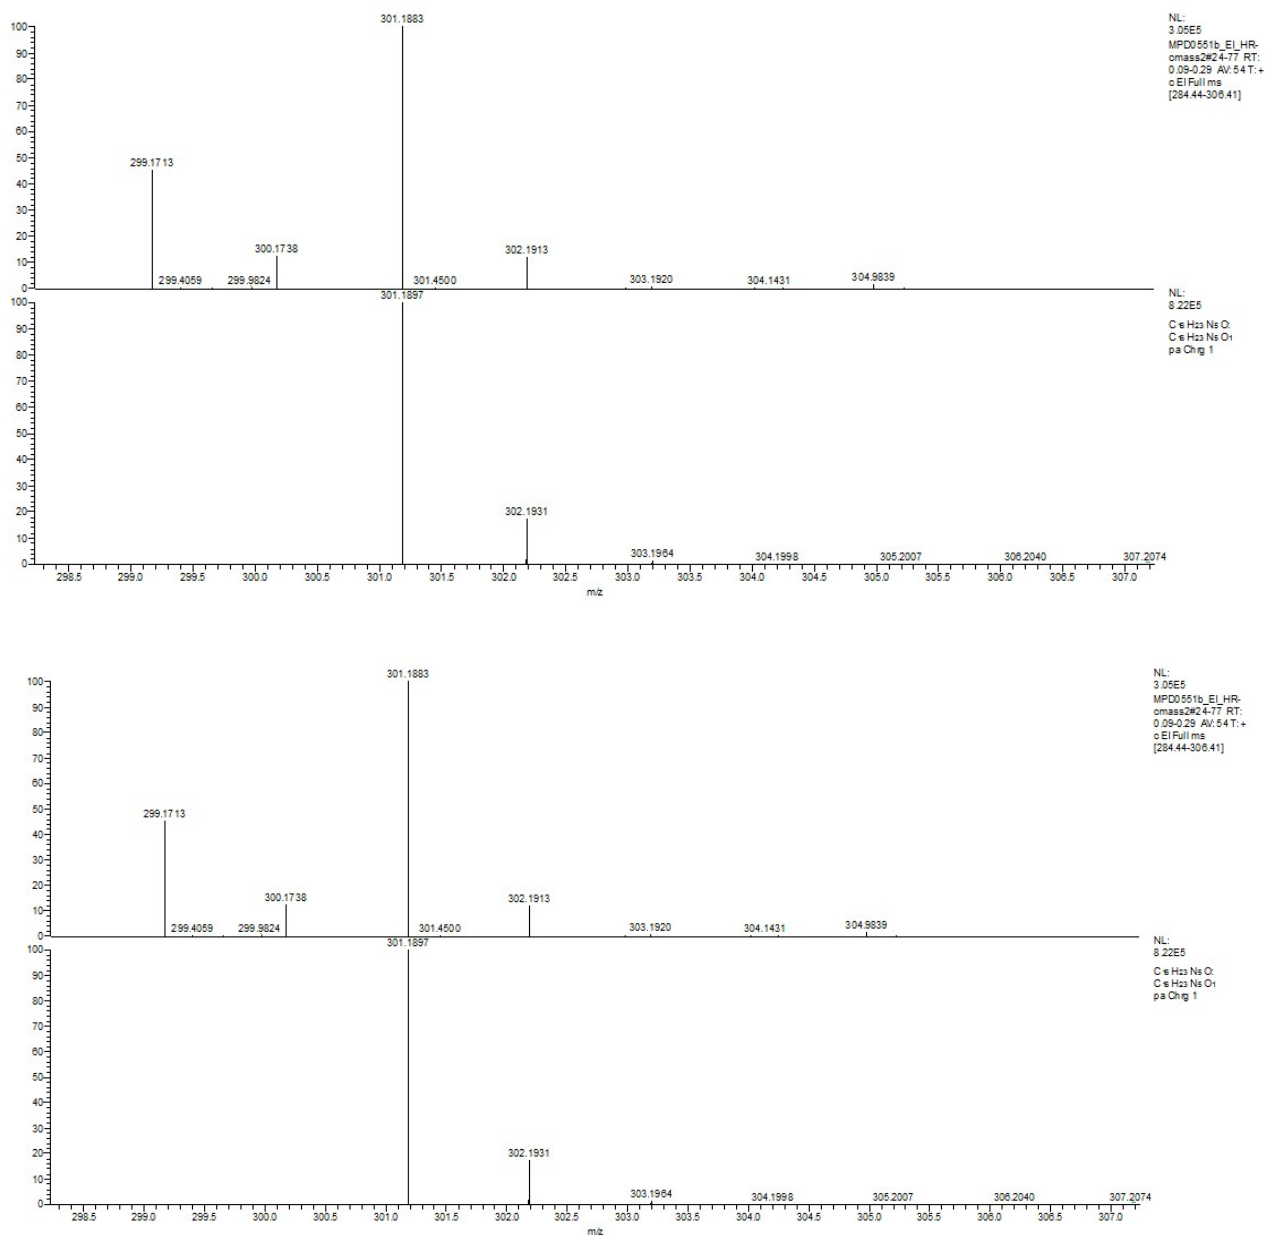

Figure S3.3.2. HRMS data for T1a (top) and T2a (bottom). For  $[M]^+ C_{16}H_{23}N_5O$  required 301.1903; Found 301.1883.

XMASS Mass Analysis for /Data/UNI\_FR/WOLL1787\_ESI/5/pdata/1/massanal.res:  
XMASS Mass Analysis Constraints

**Ion mass = 358.2600630**

**Charge = +1**

| #                                      | C  | H  | N  | O | mass        | DBE  | error     |
|----------------------------------------|----|----|----|---|-------------|------|-----------|
| *** Mass Analysis for mass 358.2600630 |    |    |    |   |             |      |           |
| 1                                      | 20 | 32 | 5  | 1 | 358.2601371 | 7.5  | 7.410e-05 |
| 2                                      | 19 | 36 | 1  | 5 | 358.2587997 | 2.5  | 1.263e-03 |
| 3                                      | 22 | 34 | 2  | 2 | 358.2614798 | 7.0  | 1.417e-03 |
| 4                                      | 17 | 34 | 4  | 4 | 358.2574570 | 3.0  | 2.606e-03 |
| 5                                      | 15 | 32 | 7  | 3 | 358.2561143 | 3.5  | 3.949e-03 |
| 6                                      | 11 | 34 | 8  | 5 | 358.2646677 | -1.0 | 4.605e-03 |
| 7                                      | 14 | 36 | 3  | 7 | 358.2547769 | -1.5 | 5.286e-03 |
| 8                                      | 13 | 30 | 10 | 2 | 358.2547717 | 4.0  | 5.291e-03 |
| 9                                      | 13 | 36 | 5  | 6 | 358.2660103 | -1.5 | 5.947e-03 |
| 10                                     | 12 | 34 | 6  | 6 | 358.2534343 | -1.0 | 6.629e-03 |

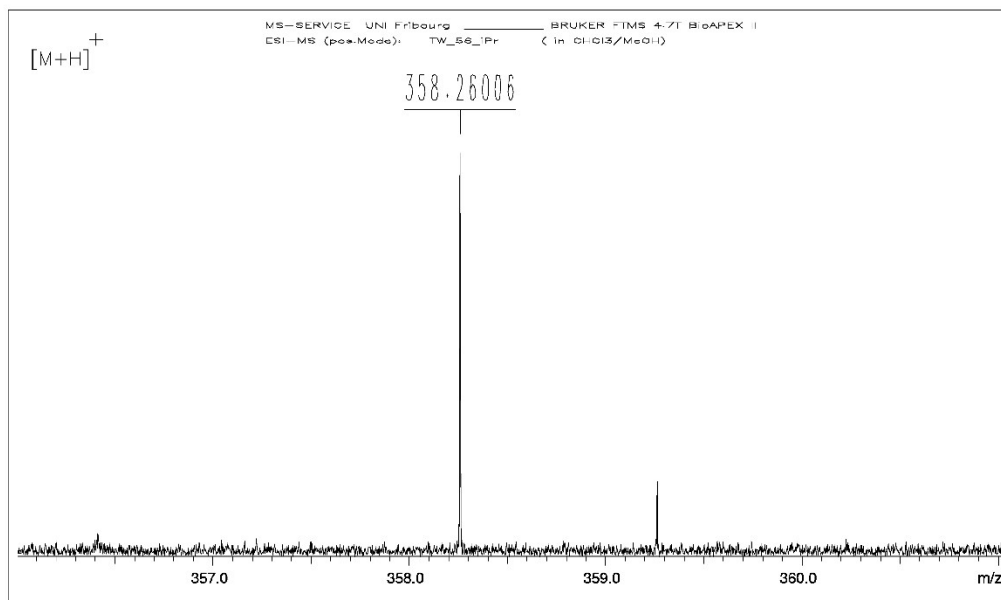

Figure S3.3.3. HRMS data for T1b.

XMASS Mass Analysis for /Data/UNI\_FR/WOLL1786\_ESI/2/pdata/1/massanal.res:  
XMASS Mass Analysis Constraints

**Ion mass = 358.2603360**

**Charge = +1**

| #                                      | C  | H  | N  | O | mass        | DBE  | error     |
|----------------------------------------|----|----|----|---|-------------|------|-----------|
| *** Mass Analysis for mass 358.2603360 |    |    |    |   |             |      |           |
| 1                                      | 20 | 32 | 5  | 1 | 358.2601371 | 7.5  | 1.989e-04 |
| 2                                      | 22 | 34 | 2  | 2 | 358.2614798 | 7.0  | 1.144e-03 |
| 3                                      | 19 | 36 | 1  | 5 | 358.2587997 | 2.5  | 1.536e-03 |
| 4                                      | 17 | 34 | 4  | 4 | 358.2574570 | 3.0  | 2.879e-03 |
| 5                                      | 15 | 32 | 7  | 3 | 358.2561143 | 3.5  | 4.222e-03 |
| 6                                      | 11 | 34 | 8  | 5 | 358.2646677 | -1.0 | 4.332e-03 |
| 7                                      | 14 | 36 | 3  | 7 | 358.2547769 | -1.5 | 5.559e-03 |
| 8                                      | 13 | 30 | 10 | 2 | 358.2547717 | 4.0  | 5.564e-03 |
| 9                                      | 13 | 36 | 5  | 6 | 358.2660103 | -1.5 | 5.674e-03 |
| 10                                     | 12 | 34 | 6  | 6 | 358.2534343 | -1.0 | 6.902e-03 |

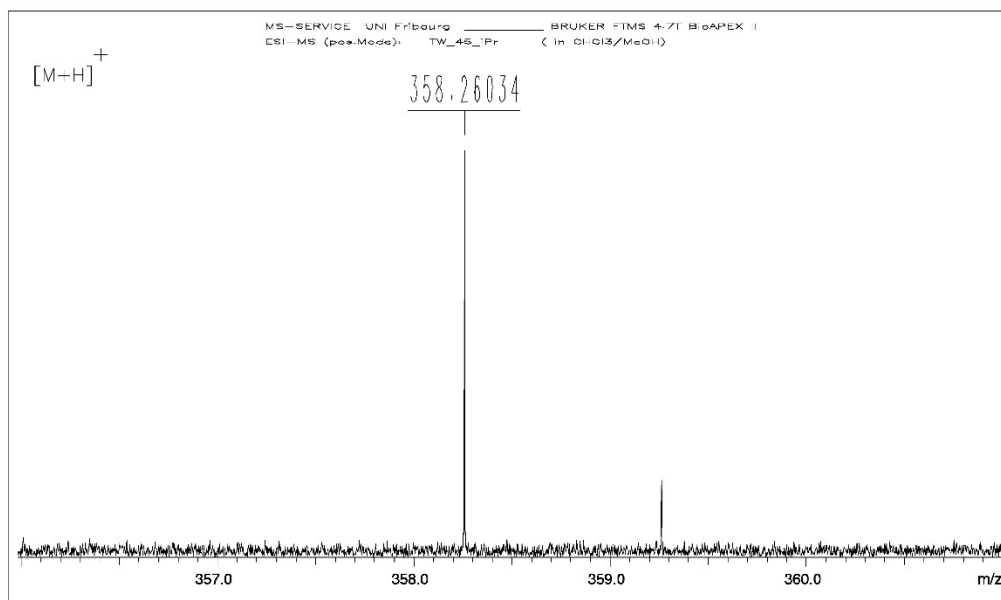

Figure S3.3.4. HRMS data for T2b.

XMASS Mass Analysis for /Data/UNI\_FR/MAMU2318\_ESI/1/pdata/1/massanal.res:  
XMASS Mass Analysis Constraints

**Ion mass = 426.229060**

**Charge = +1**

| #                                     | C         | H         | N        | O        | mass               | DBE  | error     |
|---------------------------------------|-----------|-----------|----------|----------|--------------------|------|-----------|
| *** Mass Analysis for mass 426.229060 |           |           |          |          |                    |      |           |
| 1                                     | <b>26</b> | <b>28</b> | <b>5</b> | <b>1</b> | <b>426.2288370</b> | 15.5 | 1.690e-04 |
| 2                                     | 12        | 30        | 10       | 7        | 426.2293448        | 3.0  | 3.388e-04 |
| 3                                     | 28        | 30        | 2        | 2        | 426.2301796        | 15.0 | 1.174e-03 |
| 4                                     | 25        | 32        | 1        | 5        | 426.2274996        | 10.5 | 1.506e-03 |
| 5                                     | 14        | 32        | 7        | 8        | 426.2306875        | 2.5  | 1.681e-03 |
| 6                                     | 9         | 32        | 9        | 10       | 426.2266647        | -1.5 | 2.341e-03 |
| 7                                     | 23        | 30        | 4        | 4        | 426.2261569        | 11.0 | 2.849e-03 |
| 8                                     | 16        | 34        | 4        | 9        | 426.2320301        | 2.0  | 3.024e-03 |
| 9                                     | 21        | 28        | 7        | 3        | 426.2248142        | 11.5 | 4.192e-03 |
| 10                                    | 17        | 30        | 8        | 5        | 426.2333675        | 7.0  | 4.362e-03 |

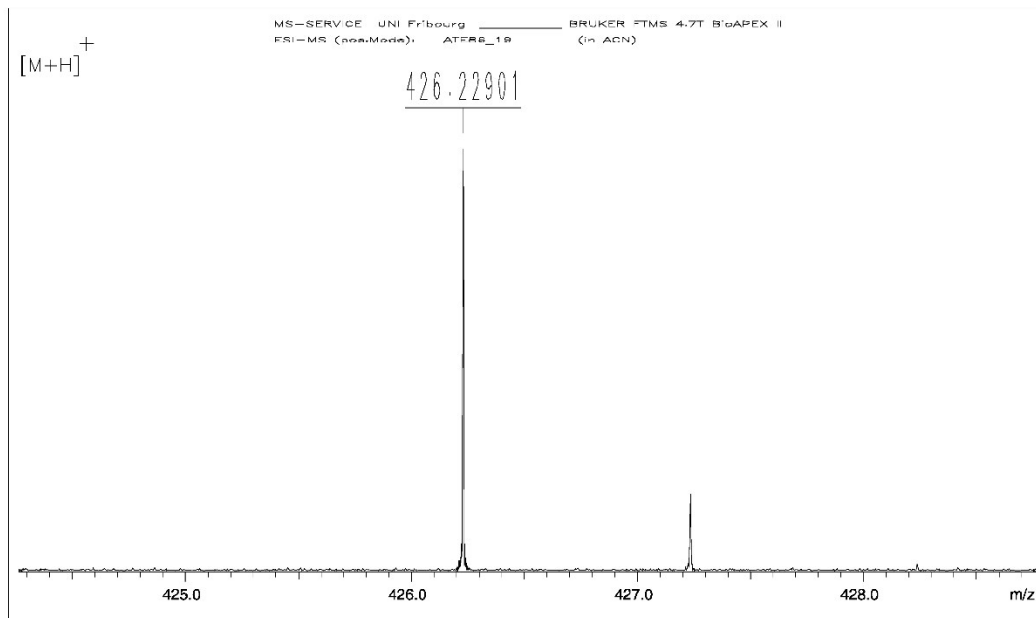

Figure S3.3.5. HRMS data for T1c.

Ion mass = 426.2282830

Charge = +1

| #                                      | C  | H  | N  | O  | mass        | DBE  | error     |
|----------------------------------------|----|----|----|----|-------------|------|-----------|
| *** Mass Analysis for mass 426.2282830 |    |    |    |    |             |      |           |
| 1                                      | 26 | 28 | 5  | 1  | 426.2288370 | 15.5 | 5.540e-04 |
| 2                                      | 25 | 32 | 1  | 5  | 426.2274996 | 10.5 | 7.834e-04 |
| 3                                      | 12 | 30 | 10 | 7  | 426.2293448 | 3.0  | 1.062e-03 |
| 4                                      | 9  | 32 | 9  | 10 | 426.2266647 | -1.5 | 1.618e-03 |
| 5                                      | 28 | 30 | 2  | 2  | 426.2301796 | 15.0 | 1.897e-03 |
| 6                                      | 23 | 30 | 4  | 4  | 426.2261569 | 11.0 | 2.126e-03 |
| 7                                      | 14 | 32 | 7  | 8  | 426.2306875 | 2.5  | 2.404e-03 |
| 8                                      | 21 | 28 | 7  | 3  | 426.2248142 | 11.5 | 3.469e-03 |
| 9                                      | 16 | 34 | 4  | 9  | 426.2320301 | 2.0  | 3.747e-03 |
| 10                                     | 20 | 32 | 3  | 7  | 426.2234768 | 6.5  | 4.806e-03 |

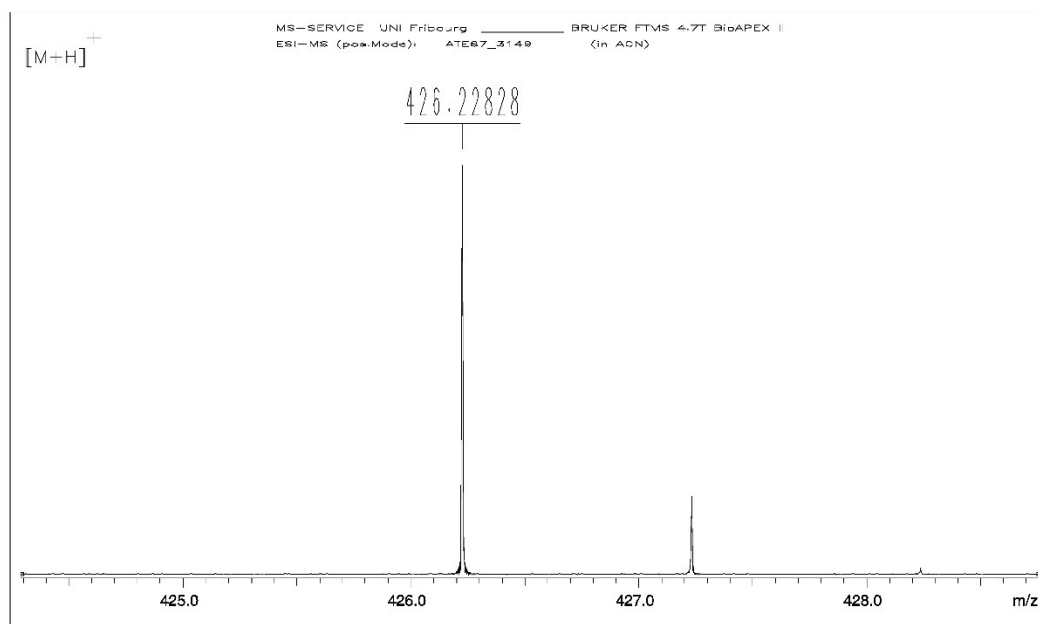

Figure S3.3.6. HRMS data for T2c.



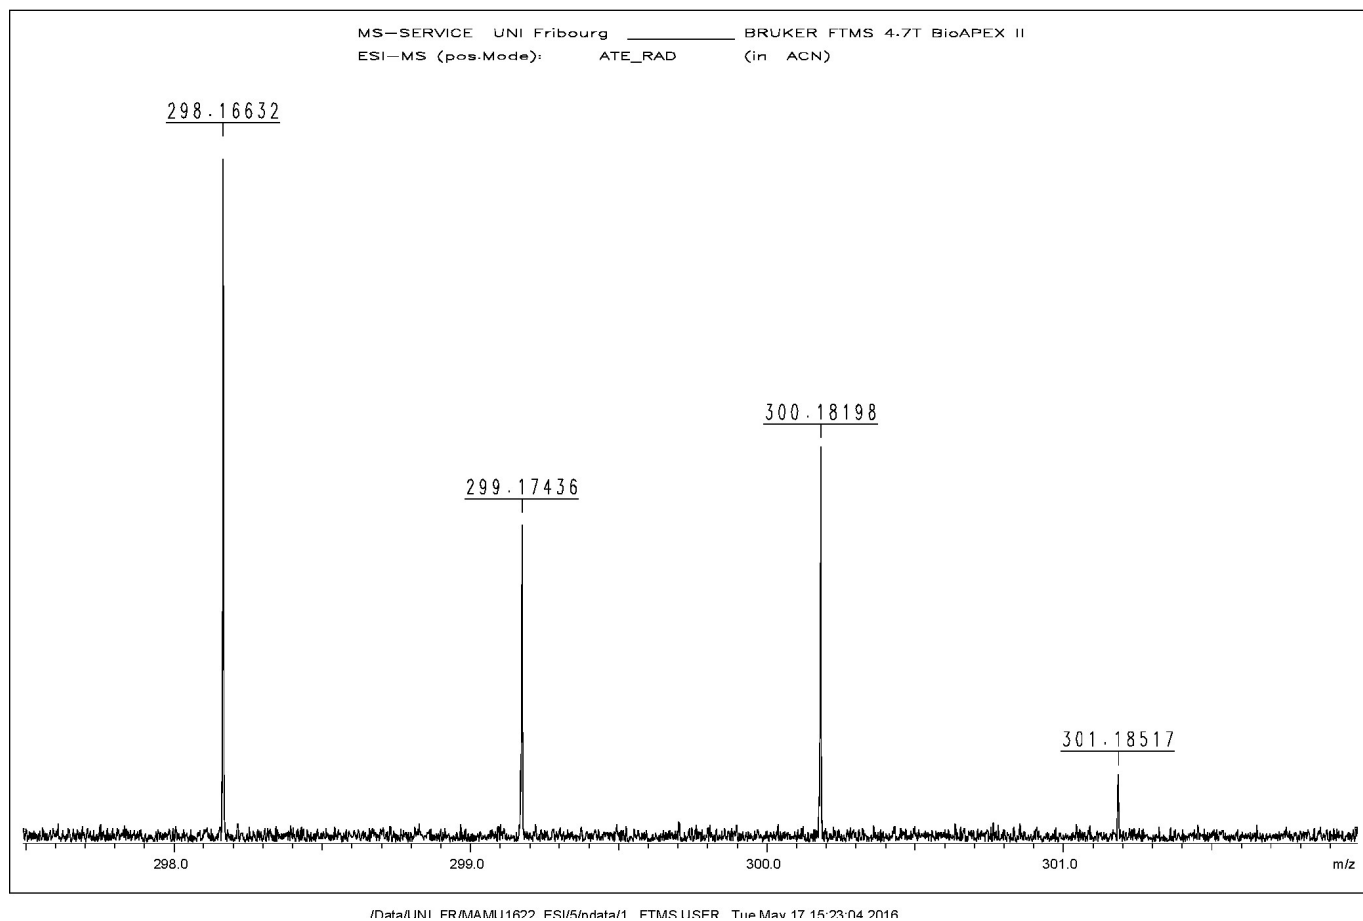

Figure S3.3.7. HRMS data for 1a.

Ion mass = 298.1660220

Charge = +1

| #                                      | C  | H  | N  | O | mass        | DBE | error     |
|----------------------------------------|----|----|----|---|-------------|-----|-----------|
| *** Mass Analysis for mass 298.1660220 |    |    |    |   |             |     |           |
| 1                                      | 16 | 20 | 5  | 1 | 298.1662367 | 9.5 | 2.147e-04 |
| 2                                      | 15 | 24 | 1  | 5 | 298.1648993 | 4.5 | 1.123e-03 |
| 3                                      | 18 | 22 | 2  | 2 | 298.1675794 | 9.0 | 1.557e-03 |
| 4                                      | 13 | 22 | 4  | 4 | 298.1635566 | 5.0 | 2.465e-03 |
| 5                                      | 11 | 20 | 7  | 3 | 298.1622140 | 5.5 | 3.808e-03 |
| 6                                      | 7  | 22 | 8  | 5 | 298.1707673 | 1.0 | 4.745e-03 |
| 7                                      | 10 | 24 | 3  | 7 | 298.1608766 | 0.5 | 5.145e-03 |
| 8                                      | 9  | 18 | 10 | 2 | 298.1608713 | 6.0 | 5.151e-03 |
| 9                                      | 9  | 24 | 5  | 6 | 298.1721099 | 0.5 | 6.088e-03 |
| 10                                     | 8  | 22 | 6  | 6 | 298.1595339 | 1.0 | 6.488e-03 |

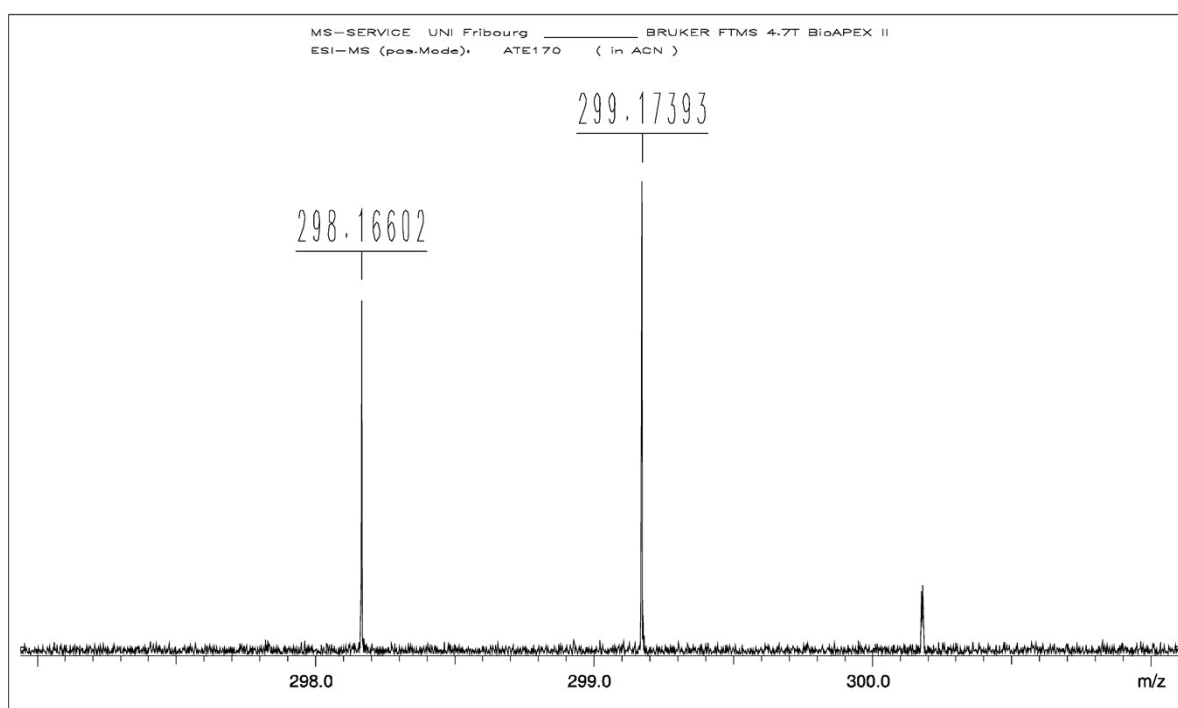

/Data/UNI FR/SOLE3312 ESI/2/pdata/1 FTMS USER Tue Jun 27 11:59:04 2017

Figure S3.3.8. HRMS data for 2a.

Ion mass = 355.2360750

Charge = +1

| #                                      | C  | H  | N  | O | mass        | DBE | error     |
|----------------------------------------|----|----|----|---|-------------|-----|-----------|
| *** Mass Analysis for mass 355.2360750 |    |    |    |   |             |     |           |
| 1                                      | 20 | 29 | 5  | 1 | 355.2366620 | 9.0 | 5.870e-04 |
| 2                                      | 19 | 33 | 1  | 5 | 355.2353246 | 4.0 | 7.504e-04 |
| 3                                      | 22 | 31 | 2  | 2 | 355.2380047 | 8.5 | 1.930e-03 |
| 4                                      | 17 | 31 | 4  | 4 | 355.2339819 | 4.5 | 2.093e-03 |
| 5                                      | 15 | 29 | 7  | 3 | 355.2326393 | 5.0 | 3.436e-03 |
| 6                                      | 14 | 33 | 3  | 7 | 355.2313018 | 0.0 | 4.773e-03 |
| 7                                      | 13 | 27 | 10 | 2 | 355.2312966 | 5.5 | 4.778e-03 |
| 8                                      | 11 | 31 | 8  | 5 | 355.2411926 | 0.5 | 5.118e-03 |
| 9                                      | 12 | 31 | 6  | 6 | 355.2299592 | 0.5 | 6.116e-03 |
| 10                                     | 13 | 33 | 5  | 6 | 355.2425352 | 0.0 | 6.460e-03 |

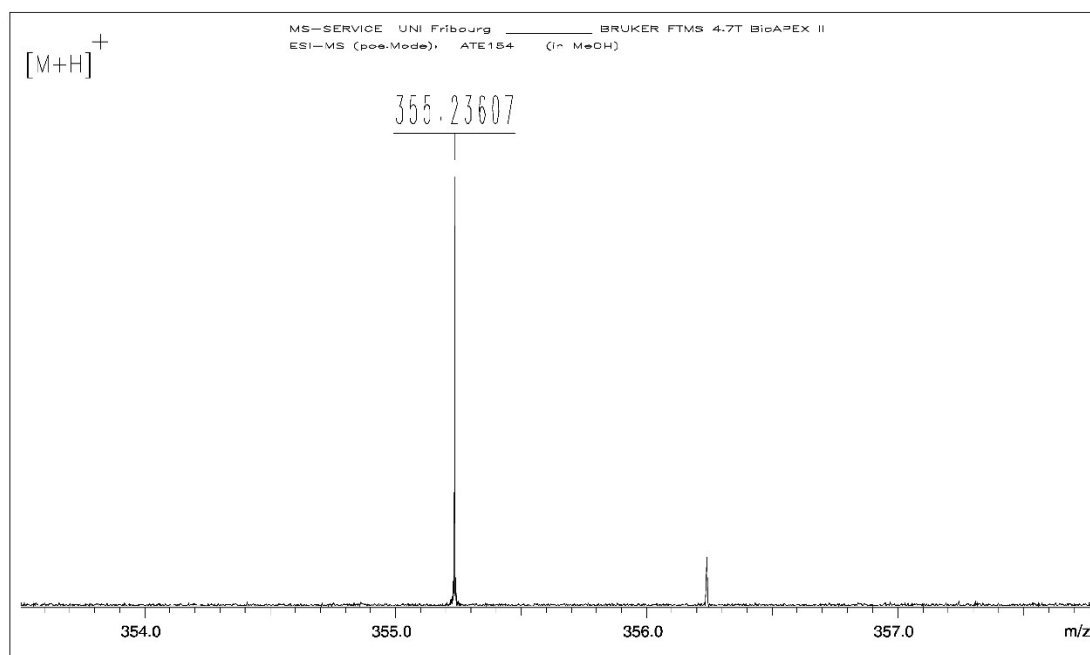

/Data/UNI FR/SOLE3146 ESI/1/pdata/1 FTMS USER Wed May 24 14:32:41 2017

Figure S3.3.9. HRMS data for 1b.

Ion mass = 355.2368650

Charge = +1

| #                                      | C  | H  | N  | O | mass        | DBE | error     |
|----------------------------------------|----|----|----|---|-------------|-----|-----------|
| *** Mass Analysis for mass 355.2368650 |    |    |    |   |             |     |           |
| 1                                      | 20 | 29 | 5  | 1 | 355.2366620 | 9.0 | 2.030e-04 |
| 2                                      | 22 | 31 | 2  | 2 | 355.2380047 | 8.5 | 1.140e-03 |
| 3                                      | 19 | 33 | 1  | 5 | 355.2353246 | 4.0 | 1.540e-03 |
| 4                                      | 17 | 31 | 4  | 4 | 355.2339819 | 4.5 | 2.883e-03 |
| 5                                      | 15 | 29 | 7  | 3 | 355.2326393 | 5.0 | 4.226e-03 |
| 6                                      | 11 | 31 | 8  | 5 | 355.2411926 | 0.5 | 4.328e-03 |
| 7                                      | 14 | 33 | 3  | 7 | 355.2313018 | 0.0 | 5.563e-03 |
| 8                                      | 13 | 27 | 10 | 2 | 355.2312966 | 5.5 | 5.568e-03 |
| 9                                      | 13 | 33 | 5  | 6 | 355.2425352 | 0.0 | 5.670e-03 |
| 10                                     | 12 | 31 | 6  | 6 | 355.2299592 | 0.5 | 6.906e-03 |

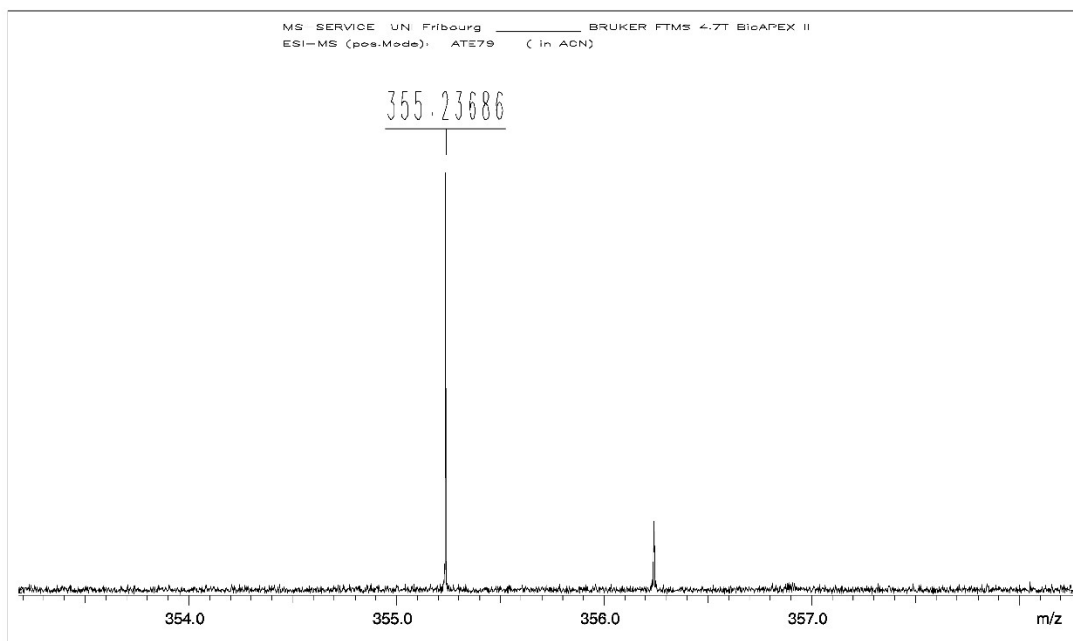

Figure S3.3.10. HRMS data for 2b.

Ion mass = 530.2188050

Charge = +1

| #                                      | C         | H         | N        | O        | mass               | DBE  | error     |
|----------------------------------------|-----------|-----------|----------|----------|--------------------|------|-----------|
| *** Mass Analysis for mass 530.2188050 |           |           |          |          |                    |      |           |
| 1                                      | <b>32</b> | <b>28</b> | <b>5</b> | <b>3</b> | <b>530.2186662</b> | 21.5 | 1.388e-04 |
| 2                                      | 18        | 30        | 10       | 9        | 530.2191740        | 9.0  | 3.690e-04 |
| 3                                      | 34        | 30        | 2        | 4        | 530.2200089        | 21.0 | 1.204e-03 |
| 4                                      | 31        | 32        | 1        | 7        | 530.2173288        | 16.5 | 1.476e-03 |
| 5                                      | 30        | 26        | 8        | 2        | 530.2173235        | 22.0 | 1.481e-03 |
| 6                                      | 20        | 32        | 7        | 10       | 530.2205167        | 8.5  | 1.712e-03 |
| 7                                      | 29        | 30        | 4        | 6        | 530.2159861        | 17.0 | 2.819e-03 |
| 8                                      | 27        | 28        | 7        | 5        | 530.2146435        | 17.5 | 4.162e-03 |
| 9                                      | 23        | 30        | 8        | 7        | 530.2231968        | 13.0 | 4.392e-03 |
| 10                                     | 26        | 32        | 3        | 9        | 530.2133061        | 12.5 | 5.499e-03 |

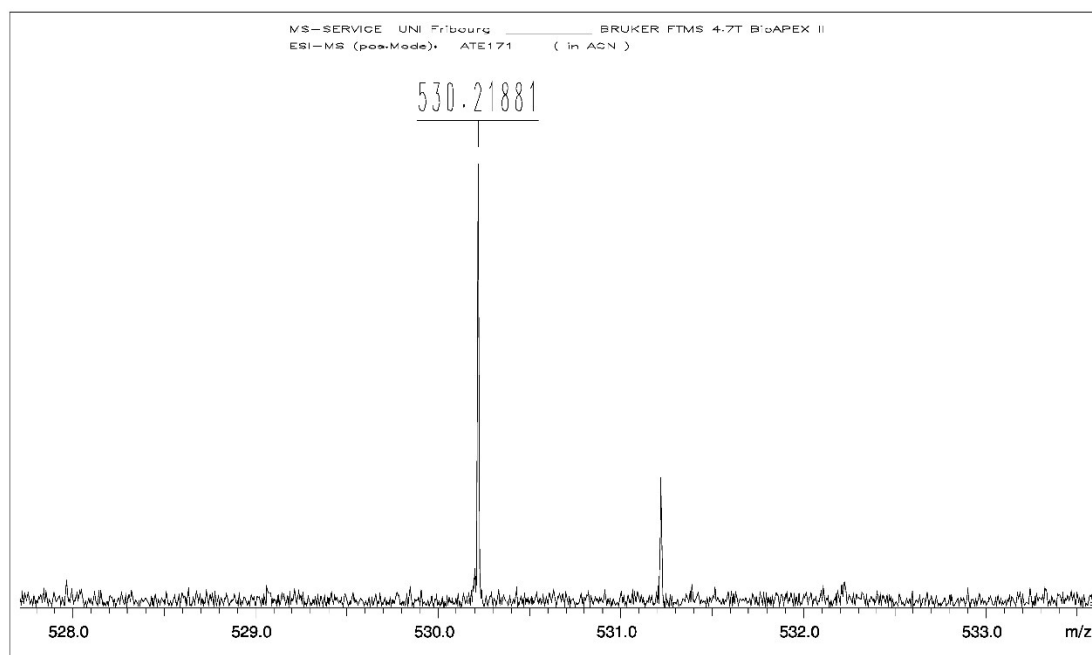

Figure S3.3.11. HRMS data for 1c\*benzoquinone.

Ion mass = 423.2048840

Charge = +1

| #                                      | C  | H  | N  | O  | mass        | DBE  | error     |
|----------------------------------------|----|----|----|----|-------------|------|-----------|
| *** Mass Analysis for mass 423.2048840 |    |    |    |    |             |      |           |
| 1                                      | 26 | 25 | 5  | 1  | 423.2053619 | 17.0 | 4.779e-04 |
| 2                                      | 25 | 29 | 1  | 5  | 423.2040245 | 12.0 | 8.595e-04 |
| 3                                      | 12 | 27 | 10 | 7  | 423.2058697 | 4.5  | 9.857e-04 |
| 4                                      | 9  | 29 | 9  | 10 | 423.2031896 | 0.0  | 1.694e-03 |
| 5                                      | 28 | 27 | 2  | 2  | 423.2067045 | 16.5 | 1.821e-03 |
| 6                                      | 23 | 27 | 4  | 4  | 423.2026818 | 12.5 | 2.202e-03 |
| 7                                      | 14 | 29 | 7  | 8  | 423.2072124 | 4.0  | 2.328e-03 |
| 8                                      | 21 | 25 | 7  | 3  | 423.2013391 | 13.0 | 3.545e-03 |
| 9                                      | 16 | 31 | 4  | 9  | 423.2085550 | 3.5  | 3.671e-03 |
| 10                                     | 20 | 29 | 3  | 7  | 423.2000017 | 8.0  | 4.882e-03 |

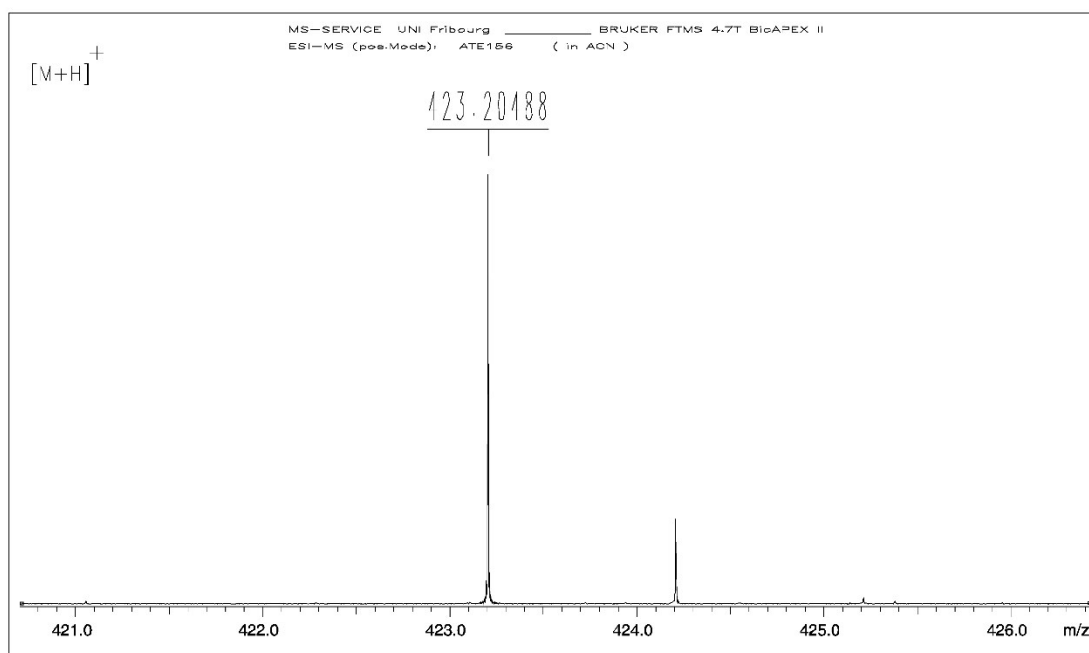

Figure S3.3.12. HRMS data for 2c

### S 3.5 EPR Data

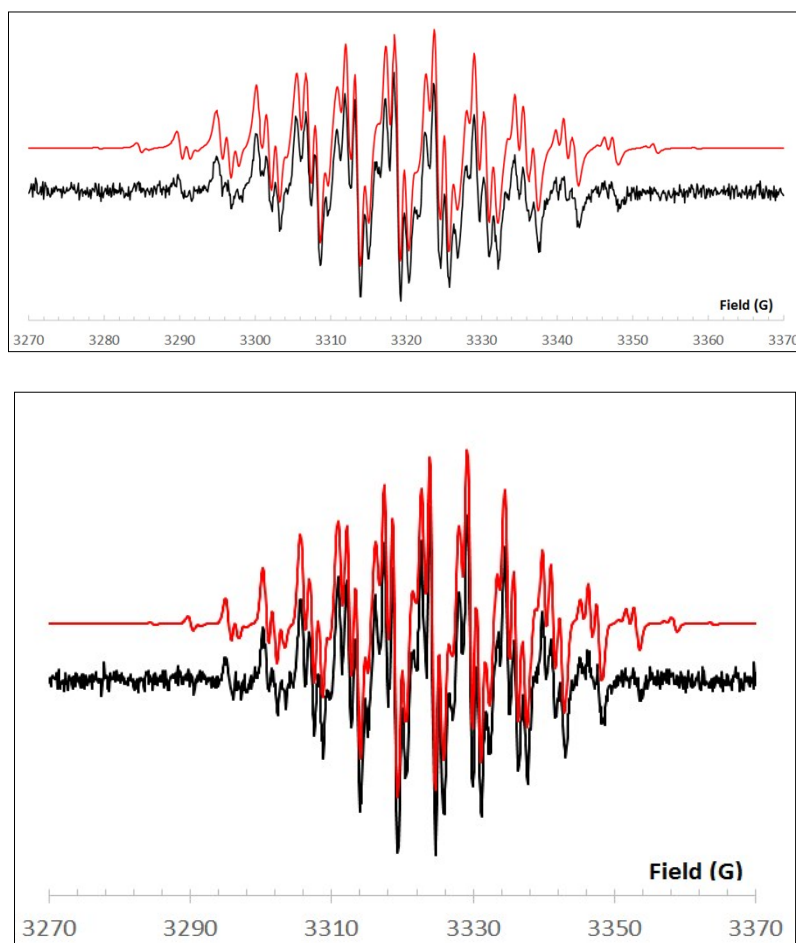

**Figure S3.4** EPR spectra of 5,6-Me **1a** (top) and 4,5-Me **2a** (bottom) at 298 K in DCM. Both simulated spectra based on  $a_N = 6.45$  G (2N),  $a_N = 5.15$  G (2N), and  $a_H = 5.45$  G (6H). The EPR spectra of **1a** and **2a** comprise a complex multiplet that can be attributed to the hyperfine coupling of the radical coupled to the four verdazyl nitrogen atoms, plus some additional super-hyperfine coupling which can be attributed to the two  $\text{CH}_3$  hydrogen atoms of the dimethyl substituents.

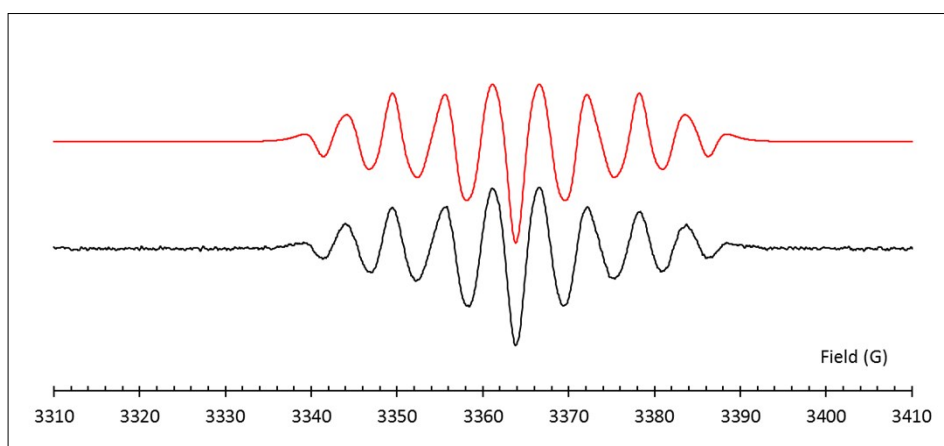

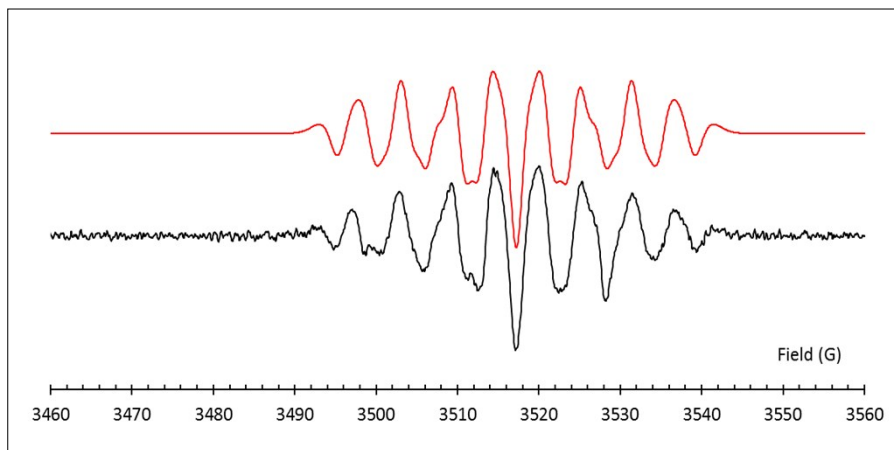

**Figure S3.5** Second derivative EPR spectra of 5,6-Ph **1c** (top) and 4,5-Ph **2c**(bottom) at 298 K in DCM. Experimental spectra in black and simulations in red. For **1c** the spectrum was simulated using  $a_N = 6.39$  G (2N),  $a_N = 4.78$  G (2N), and  $a_H = 0.61$  G (4H), \* linewidth 1.85  $G_{pp}$ . [Hyperfine coupling to H atoms was less than the inherent linewidth and unresolved. For **2c** the spectrum was simulated using  $a_N = 6.35$  G (2N),  $a_N = 4.60$  G (2N), and  $a_H = 0.57$  G (4H), \* linewidth 1.4  $G_{pp}$ . The values quoted are estimated based on the best fit to the line shape].

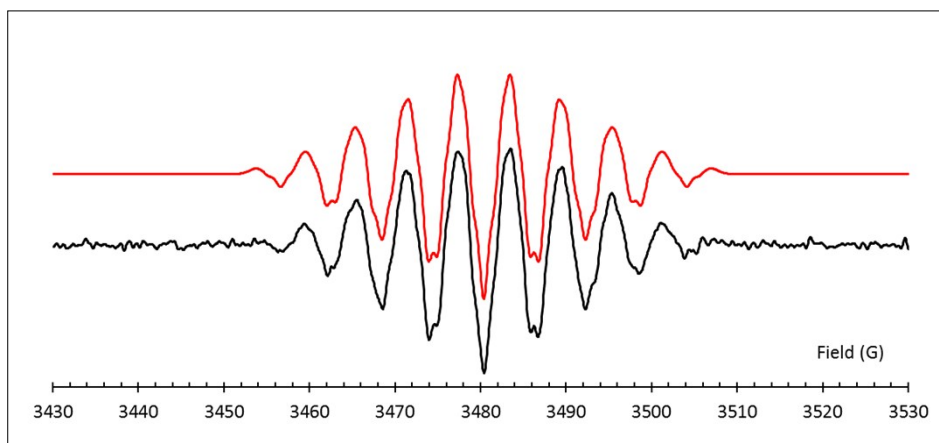

**Figure S3.6** Second derivative EPR spectra of 5,6-iPr **1b** (top) and 4,5-iPr **2b**(bottom) at 298 K in DCM. Experimental spectra in black and simulations in red. Both spectra were simulated using  $a_N = 6.48$  G (2N),  $a_N = 5.47$  G (2N), and  $a_H = 1.47$  G (2H), \* linewidth 1.0  $G_{pp}$ .



## S4. Computational Studies

DFT and TD-DFT calculations were undertaken on radicals **1a** and **2a** based on a geometry-optimised UB3LYP-6311G\*\* structure using an open shell doublet configuration which afforded no imaginary frequencies consistent with an energy minimum. All calculations were performed within Jaguar 9.0. The nature of the singly occupied molecular orbital and the total spin density distribution is shown in Figure S4 and reveal the unpaired electron density in both cases is primarily located on the verdazyl moiety. For radical **1a** significant ( $> \pm 3\%$ ) Mulliken atomic spin densities revealed comprised a negative spin density at the C-centre (-13.7%),\* 39.4 and 38.4% on the N atoms adjacent to the pyridyl ring and 19.4 and 19.6% adjacent to the carbonyl. For radical **2a** the corresponding spin densities are: C -13.7%, N 39.2 and 38.6%, N 19.6 and 19.5% respectively. The presence of the pyridyl ring clearly leads to a breaking of the symmetry and a slight asymmetry in the spin distribution within both molecules. Nevertheless, each can be considered as having two pairs of near-equivalent N atoms with each pair bearing ca. 39% and 19.5% spin density each. This is consistent with the experimental EPR spectra which reveal coupling to two sets of two chemically distinct  $^{14}\text{N}$  nuclei ( $I = 1$ ), with additional hyperfine coupling to the methyl-H atoms arising through hyper-conjugation effects. For information: The different energy of electron-electron repulsions between 'spin-up' and 'spin-up' ( $\alpha$  electrons) is less than the electron-electron repulsion between 'spin up' and 'spin down' ( $\beta$  electrons) electrons due to quantum effects. [Consider Hund's rules of maximum multiplicity which we apply to transition metal ion configurations; electrons prefer to be placed in separate orbitals co-parallel (because the anti-parallel configuration is higher in energy)]. With an odd number of electrons the energy of the  $\alpha$ -spins and  $\beta$ -spins are not quite the same since the  $\alpha$ -spins are repelled by  $n$   $\beta$ -spins whereas the  $\beta$ -spins are repelled by  $(n+1)$   $\alpha$ -spins. Since  $H\psi = E\psi$  then the difference in energies leads to wavefunctions for the  $\alpha$ -spins ( $\psi_\alpha$ ) which are not the same as  $\psi_\beta$ . Reality is that  $\psi_\beta$  tries to avoid regions where the extra  $\alpha$ -electron is. Therefore, there tends to be slightly more than 100% positive ( $\alpha$ ) spin density and a small 'negative' spin density in regions where the  $\alpha$ -spin density is nodal.

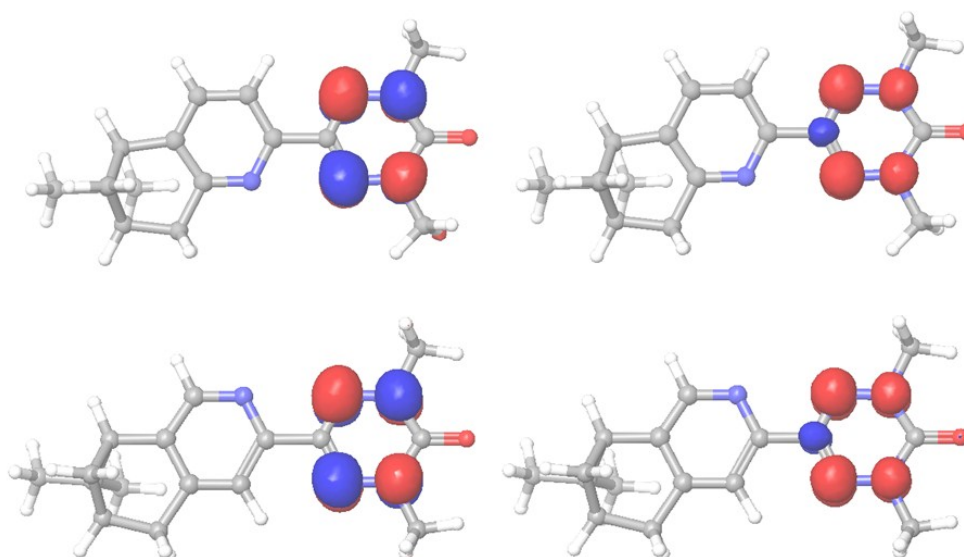

**Figure S4.** (left) Singly-occupied molecular orbitals for radical **1a** (top) and **2a** (bottom); (right) total spin density distribution for **1a** (top) and **2a** (bottom) (red = positive spin density, blue= negative spin density)

## S5. References

- [1] A.L. Sauers, D.M. Ho and S. Bernhard, *J. Org. Chem.*, 2004, **69**, 8910 – 8915.
- [2] E.D. Mihelich and D.J. Eickhoff, *J. Org. Chem.*, 1983, **48**, 4135 – 4137.
- [3] R. Calabretta, C. Gallina and C. Giordano, *Synthesis*, 1991, 536 – 539.
- [4] J. Shao, X. Liu, K. Shu, P. Tang, J. Luo, W. Chen and Y. Yu, *Org. Lett.*, 2015, **17**, 4502 – 4505.
- [5] D. Matuschek, S. Eusterwiemann, L. Stegemann, C. Doerenkamp, B. Wibbeling, C.G. Daniliuc, N.L. Doltsinis, C.A. Strassert, H. Eckert and A. Studer, *Chem. Sci.*, 2015, **6**, 4712 – 4716.
- [6] E.C. Pare, D.J. Brook, A. Brieger, M. Badik and M. Schinke, *Org. Biomol. Chem.*, 2005, **3**, 4258 – 4261.
- [7] D.R. Duling, *J. Magn. Reson.*, 1994, **B104**, 105 – 110.
- [8] A.D. Bochevarov, E. Harder, T.F. Hughes, J.R. Greenwood, D.A. Braden, D.M. Philipp, D. Rinaldo, M.D. Halls, J. Zhang and R.A. Friesner, *Int. J. Quantum Chem.*, 2013, **113**, 2110 – 2142.
- [9] C.L. Barr, P.A. Chase, R.G. Hicks, M.T. Lemaire and C.L. Stevens, *J. Org. Chem.*, 1999, **64**, 8893 – 8897.
- [10] Y. Masuda, M. Kuratsu, S. Suzuki, M. Kozaki, D. Shiomi, K. Sato, T. Takui, K. Okada, *Polyhedron*, 2009, **28**, 1950 – 1954.
- [11] C. W. Johnston, S. D. J. McKinnon, B. O. Patrick, R. G. Hicks, *Dalton Trans.*, 2013, **42**, 16829–16836.
- [12] J. Cosier and A.M. Glazer, *J. Appl. Crystallogr.*, 1986, **19**, 105 – 107.
- [13] E. Blanc, D. Schwarzenbach and H.D. Flack, *J. Appl. Crystallogr.*, 1991, **24**, 1035 – 1041.
- [14] G. M. Sheldrick, *Acta Crystallogr.*, 2015, **C71**, 3 – 8.
- [15] a) D. J. Brook, S. Fornell, J. E. Stevens, B. Noll, T. H. Koch, W. Eisfeld, *Inorg. Chem.* 2000, **39**, 562–567. b) J. B. Gilroy, S. D. J. McKinnon, P. Kennepohl, M. S. Zsombor, M. J. Ferguson, L. K. Thompson, R. G. Hicks, *J. Org. Chem.* 2007, **72**, 8062–8069.
